# Supplementary material for: Pregnancy anaemia, child health and development: a cohort study in rural India
Source: PubMed Central journal article supplement — BMJ Open. 2021 Nov 12;11(11):e046802. doi: 10.1136/bmjopen-2020-046802 (PMC8593731; doi:10.1136/bmjopen-2020-046802), 2021-11-12
Supplement: bmjopen-2020-046802.draft_revisions.pdf [file bmjopen-2020-046802.draft_revisions.pdf]

# BMJ Open

BMJ Open is committed to open peer review. As part of this commitment we make the peer review history of every article we publish publicly available.

When an article is published we post the peer reviewers' comments and the authors' responses online. We also post the versions of the paper that were used during peer review. These are the versions that the peer review comments apply to.

The versions of the paper that follow are the versions that were submitted during the peer review process. They are not the versions of record or the final published versions. They should not be cited or distributed as the published version of this manuscript.

BMJ Open is an open access journal and the full, final, typeset and author-corrected version of record of the manuscript is available on our site with no access controls, subscription charges or pay-per-view fees (<http://bmjopen.bmj.com>).

If you have any questions on BMJ Open's open peer review process please email [info.bmjopen@bmj.com](mailto:info.bmjopen@bmj.com)

# BMJ Open

## Pregnancy anemia, child health and development: A cohort study in rural India

|                               |                                                                                                                                                                                                                                 |
|-------------------------------|---------------------------------------------------------------------------------------------------------------------------------------------------------------------------------------------------------------------------------|
| Journal:                      | <i>BMJ Open</i>                                                                                                                                                                                                                 |
| Manuscript ID                 | bmjopen-2020-046802                                                                                                                                                                                                             |
| Article Type:                 | Original research                                                                                                                                                                                                               |
| Date Submitted by the Author: | 10-Nov-2020                                                                                                                                                                                                                     |
| Complete List of Authors:     | Heesemann, Esther; University of Mannheim, Economics; Center for Evaluation and Development, Mähler, Claudia; University of Hildesheim<br>Subramanyam, Malavika; IIT Gandhinagar<br>Vollmer, Sebastian; University of Göttingen |
| Keywords:                     | Nutrition < TROPICAL MEDICINE, Anaemia < HAEMATOLOGY, Epidemiology < INFECTIOUS DISEASES, Maternal medicine < OBSTETRICS                                                                                                        |
|                               |                                                                                                                                                                                                                                 |

SCHOLARONE™  
Manuscripts

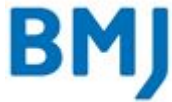

I, the Submitting Author has the right to grant and does grant on behalf of all authors of the Work (as defined in the below author licence), an exclusive licence and/or a non-exclusive licence for contributions from authors who are: i) UK Crown employees; ii) where BMJ has agreed a CC-BY licence shall apply, and/or iii) in accordance with the terms applicable for US Federal Government officers or employees acting as part of their official duties; on a worldwide, perpetual, irrevocable, royalty-free basis to BMJ Publishing Group Ltd ("BMJ") its licensees and where the relevant Journal is co-owned by BMJ to the co-owners of the Journal, to publish the Work in this journal and any other BMJ products and to exploit all rights, as set out in our [licence](#).

The Submitting Author accepts and understands that any supply made under these terms is made by BMJ to the Submitting Author unless you are acting as an employee on behalf of your employer or a postgraduate student of an affiliated institution which is paying any applicable article publishing charge ("APC") for Open Access articles. Where the Submitting Author wishes to make the Work available on an Open Access basis (and intends to pay the relevant APC), the terms of reuse of such Open Access shall be governed by a Creative Commons licence – details of these licences and which [Creative Commons](#) licence will apply to this Work are set out in our licence referred to above.

Other than as permitted in any relevant BMJ Author's Self Archiving Policies, I confirm this Work has not been accepted for publication elsewhere, is not being considered for publication elsewhere and does not duplicate material already published. I confirm all authors consent to publication of this Work and authorise the granting of this licence.

1 **Pregnancy anemia, child health and development: A cohort study in rural India**

2 Esther Heesemann<sup>1</sup>, Claudia Mähler<sup>2</sup>, Malavika A. Subramanyam<sup>3</sup> and Sebastian Vollmer<sup>4</sup>

3 <sup>1</sup> University of Mannheim and Center for Evaluation and Development C4ED, Germany (EH)

4 <sup>2</sup> University of Hildesheim, Institute for Psychology, Germany (CM)

5 <sup>3</sup> Indian Institute of Technology (IIT) Gandhinagar, Social Epidemiology, Social Sciences,  
6 India (MAS)

7 <sup>4</sup> University of Goettingen, Department of Economics and Centre for Modern Indian Studies,  
8 Germany (SV)

9

10 Corresponding author: Esther Heesemann, O7 3, 68161 Mannheim, Germany, phone: 0049-  
11 17632603941, email: esther.heesemann@gmail.com

12

13 Word count: 3996

14

## 15 Abstract

16 **Objective:** To assess how pregnancy anemia affects the offspring's early childhood  
17 development, child hemoglobin (Hb) levels, growth and diseases incidence outcomes two  
18 years after birth in a low-income setting. Further we investigate the mediating role of  
19 childhood Hb levels with disease incidences and skills.

20 **Design:** Prospective cohort study.

21 **Setting and participants:** The study participants are 999 mother-child dyads from rural  
22 Madhepura in Bihar, India. In 2015, the women were recruited during pregnancy from  
23 registers in mother-child centers of 140 villages for the first wave of data collection. At the  
24 time of the second wave in 2017, the children were 22-32 months old.

25 **Primary and Secondary Outcome Measures:** The recruited women were visited at home  
26 for a household survey and the measurement of the women's and child's hemoglobin level,  
27 child weight and height. Data on the incidence of diarrhea and fever were collected from  
28 interviews with the mothers. To test motor, cognitive, language and socio-emotional skills of  
29 the children, we used an adapted version of the child development assessment FREDI.

30 **Results:** The average Hb during pregnancy was 10.2 g/dl and 69% of the women had  
31 pregnancy anemia. At the age of 22-32 months, a 1 g/dl increase in Hb during pregnancy was  
32 associated with a 0.17 g/dl (95% CI: 0.11- 0.23) increase in Hb levels of the child. Children of  
33 moderately or severely anemic women during pregnancy showed 0.57 g/dl (95% CI: -0.78 - -  
34 0.36) lower Hb than children of not anemic women. We find no association between the  
35 maternal Hb during pregnancy and early skills, stunting, wasting, underweight, or disease  
36 incidence. Childhood Hb correlates positively with skills (marginal effect 0.04, 95% CI: 0.01  
37 - 0.08).

38 **Conclusions:** Pregnancy anemia is a risk factor for anemia during childhood, but does not  
39 increase the risk of infectious diseases or affect early childhood development.

40 **Keywords:** Pregnancy, anemia, hemoglobin, early childhood development, motor skills,  
41 cognitive skills, language skills, socio-emotional skills, child health, India

## 44 STRENGTHS AND LIMITATIONS OF THIS STUDY

- 45 • To reduce endogeneity, we controlled for maternal Hb and household food security  
46 after pregnancy, together with other relevant confounders factors.
- 47 • The study used a unique sample of women with little contact to antenatal health  
48 services and high rate of anemia.
- 49 • Inverse probability weighting was used to account for missing data and attrition.
- 50 • The data contains only one measure of Hb during pregnancy.

51

## 52 INTRODUCTION

53 Sufficient intake of macro- and micronutrients during pregnancy is a prerequisite for healthy  
54 child development.[1] Yet, the high rates of pregnancy anemia, i.e. having a low level of  
55 hemoglobin level in the blood, document the precarious state of nutrition among many pregnant  
56 women worldwide. In 2011, 32 million women were estimated to be anemic, the vast majority  
57 living in South Asia.[2] One of the most common causes of anemia in low- and middle-income  
58 countries, such as India, is iron deficiency.[3, 4]. Anemia can however also result from other  
59 micronutrient deficiencies such as folic acid, vitamin B12, and vitamin A, as well as infectious  
60 diseases and genetic disorders. A focus on anemia is imperative because hemoglobin (Hb) is a  
61 crucial ingredient of red blood cells and thereby responsible for the transport of oxygen to the  
62 body tissues. Low hemoglobin during pregnancy is a known risk factor for premature birth, low  
63 birth weight, and in extreme cases leads to death.[5–9]

64 In this paper, we investigate the consequences of pregnancy anemia on child Hb levels, early  
65 skills and other health indicators in the first 1,000 days. Most of the iron requirement in the first  
66 year of life is met by the body iron a child is born with, either in the form of hemoglobin or in  
67 iron stores (ferritin). The amount of ferritin and hemoglobin at birth depends heavily on the  
68 iron transfer from mother to child in-utero, which occurs in the second and third trimester of  
69 pregnancy.[10] Studies have shown that anemia during pregnancy correlates with low cord  
70 hemoglobin levels and anemia during infancy.[11–15] To our knowledge, there are no studies  
71 investigating the relationship of pregnancy anemia and anemia of children older than 18  
72 months. Yet, with a prevalence of 58%, anemia of children below the age of five remains a  
73 significant global health challenge in South Asia and its causes are worth investigating.[16] The

74 known adverse consequences of childhood anemia on human development add importance to  
75 this matter.[17, 18]

76 While several experimental and non-experimental studies have examined the impact of  
77 pregnancy anemia on early skills, the empirical findings are inconclusive.[19] This might be a  
78 result of the different study design, age variation of the study participants, the dimensions of  
79 skills measured, or geographical diversity.[20–27] Furthermore, as pregnancy anemia is a risk  
80 for adverse birth outcomes, the existing experimental studies exclude moderately and severely  
81 anemic women from the trials. Hence, the external validity of their findings for the general  
82 population of pregnant women is unclear. Observational studies without the appropriate quasi-  
83 experimental methods are unable to identify a causal impact of anemia during pregnancy on  
84 child outcomes due to omitted, endogenous variables. For instance, ignoring time-invariant  
85 environmental factors is likely to upwardly bias the results of non-experimental studies.

86 We contribute to the existing literature by analyzing the consequences of pregnancy anemia on  
87 child outcomes in three essential ways. First, we eliminate an important confounder in the  
88 analysis by controlling for the maternal hemoglobin levels and the food diversity of the  
89 household after birth. While not being able to fully capture the unobservable differences  
90 between children exposed to pregnancy anemia and without, our set of covariates will omit the  
91 bias emerging from any differences in micronutrient diversity in the post-natal period. Second,  
92 by following the children more than two years after birth, we can observe if potential initial  
93 disadvantages persisted over time. Lastly, in addition to cognitive and non-cognitive functions,  
94 and anemia, we also assess the influence of pregnancy anemia on secondary health outcomes,  
95 namely child growth and disease incidence. This analysis will help to get a deeper  
96 understanding of the adverse consequences of anemia during pregnancy.

## 97 **METHODS**

### 98 **Data and procedures**

99 Our dataset is a panel of two waves, consisting of household surveys, anthropometric and blood  
100 sample collections, and child development tests conducted in Madhepura in the North-Eastern  
101 state Bihar. Bihar is one of the poorest states of India and Madhepura belongs to its socio-  
102 economically most deprived districts. Our study sample was taken from pregnancy registers in  
103 local mother-child-centers (*Anganwadi* centers) in 140 villages in six sub-districts (blocks) of  
104 Madhepura. It should hence be noted that our sample is not representative of the full population

105 of pregnant women in that area, but only for those who registered in the centers. In 2015/16,  
106 this covered 76% of pregnant women.[28]

107 All women listed in the registries in March/April 2015 were visited and invited to participate  
108 in the baseline survey and medical tests. During the follow-up in 2017, we attempted to revisit  
109 the households of all formerly pregnant women. In addition to the survey and medical measures,  
110 a development test was administered to the child that resulted from the pregnancy.  
111 **Supplementary Figure S1** visualizes the data collection timeline and the age of the children.

112

### 113 **Outcome measures**

114 Anemia is defined over the hemoglobin level in the blood, which in our case was obtained from  
115 a finger prick in the field collected by trained local enumerators. Using HemoCue® machines  
116 for capillary blood, the hemoglobin level can be determined immediately and communicated to  
117 the tested individual or its caregivers on the spot. According to the WHO and the Indian Council  
118 of Medical Research definitions, a pregnant woman is anemic if her hemoglobin concentration  
119 falls below 11.0 g/dl.[29, 30] Pregnancy anemia is further distinguished into mild anemia (10.0-  
120 10.9 g/dl), moderate anemia (7.0-9.9 g/dl) and severe anemia (<7.0 g/dl). The anemia thresholds  
121 for children between 6 and 59 months are the same as for pregnant women.[30]

122 During data collections, the field teams followed a strict protocol upon detection of anemia. In  
123 case of mild or moderate anemia, the women / caregivers were advised to go to the nearest  
124 primary health care center soon to seek treatment for anemia. In case of severe anemia, the  
125 household was alerted that immediate attention was needed. In the follow-up survey, we also  
126 offered to cover the treatment costs and transport to a health facility for all severely anemic  
127 children.

128 Child development was measured with a variation of the FREDI 0-3, a German development  
129 test similar in structure to the Bayles Scales of Infant and Toddler Development.[31–33] Due  
130 to the different home environments of the children, certain items of the original FREDI 0-3  
131 were adjusted to the Bihari context. The development test consists of a parent questionnaire and  
132 a child assessment, and covers four areas: fine and gross motor development, receptive and  
133 expressive language development, cognition, and socio-emotional development. Two age-  
134 specific tests were administered, each covering skills over an age range of five months. Each



1  
2  
3 135 test consisted of around 40 items. All raw scores have been standard normalized and are hence  
4 presented as z-scores. In addition to the four individual test scores, we calculate the total FREDI  
5 136 z-score over all 40 test items. A brief validation of the FREDI with regard to physical growth  
6 137 and maternal education is presented in **Supplemental Figure S2 and S3**.  
7 138

8  
9  
10  
11 139 Stunting (i.e. being too short for their age), wasting (i.e. being too light for their height), and  
12 140 underweight (i.e. being too light for their age) are used as secondary health outcomes.  
13 141 Children's height and weight were measured during the field visits by the blood testing team.  
14 142 We age-standardized the raw height and weight values following the WHO Growth  
15 143 Standards.[34] With a respective z-score of two standard deviations (SD) below the median of  
16 144 the WHO references population, a child is defined as being either stunted, wasted or  
17 145 underweight. Any value above six standard deviations or below – six SD was coded as  
18 146 measurement error and dropped from the analyses.<sup>1</sup> The information on diarrhea and  
19 147 respiratory disease incidences in the two weeks before the survey were collected from maternal  
20 148 reports and coded as binary variables.

### 29 149 **Patient and public involvement**

30  
31  
32 150 The aims and the survey design were shared at a meeting of state-and district-level government  
33 151 functionaries who provided services in Madhepura through the Women and Child Development  
34 152 ministry, village-level leaders of women's groups prior to the baseline. At this meeting, there  
35 153 was a detailed discussion of the types of questions that needed to be asked during the data  
36 154 collection. Several of these suggestions were incorporated in the baseline questionnaire.  
37 155 Residents of Madhepura were involved to the extent that they participated in the pre-testing of  
38 156 the baseline questionnaire and the FREDI tool. Patients had not been involved in the  
39 157 interpretation of results, writing or editing of the final document.

### 46 158 **Statistical analysis**

47  
48  
49 159 In our main analysis, we estimated the association between pregnancy anemia and the child  
50 160 hemoglobin level and child development approximately two years after birth using an ordinary  
51  
52  
53  
54  
55

---

56  
57  
58 <sup>1</sup> This was the case for 21 weight-for-height z-scores, seven weight-for-age z-scores and eleven height-for-  
59 age z-scores.  
60

1  
2  
3 161 least square regression model. Our secondary outcomes of interest, - being stunted, wasted, or  
4  
5 162 underweight, incidence of diarrhea and respiratory diseases in the two weeks before the survey,  
6  
7 163 were analyzed with a logistical regression model.  
8

9 164 We considered both continuous and discrete hemoglobin levels to allow for linear and non-  
10  
11 165 linear relationships between pregnancy anemia and the child outcomes. For the linear  
12  
13 166 relationship, our explanatory variable of interest was the Hb levels of the women during  
14  
15 167 pregnancy. For the non-linear relationship, we used the categorical variables anemia status: no  
16  
17 168 pregnancy anemia, mild pregnancy anemia and moderate-to-severe pregnancy anemia.  
18

19 169 All estimations controlled for the maternal Hb levels at the time of the follow-up and the  
20  
21 170 household food diversity scores. This was done to avoid an overestimation of the relationship  
22  
23 171 between pregnancy and child outcomes due to an overall poor food environment or chronic  
24  
25 172 diseases of the mothers. We further add age, sex and current breast-feeding status of the child,  
26  
27 173 as well as development test facilitator or HemoCue machine as control variables to obtain more  
28  
29 174 precise estimates. Additional covariates from the baseline data collected are: caste category,  
30  
31 175 wealth quintile, maternal literacy, maternal age, pregnancy history (first birth dummy),  
32  
33 176 trimester of gestation and take-up of antenatal care (ANC) services. Lastly, we added sub-  
34  
35 177 district (block) fixed effects and clustered the standard errors on village level to take spatial  
36  
37 178 correlation of the outcome variables into account. For the sensitivity analysis, we include birth  
38  
39 179 spacing, macronutrient deficiency and postnatal depression to the estimation, and replaced  
40  
41 180 block with *panchayat* fixed effects.<sup>2</sup>

42 181 In light of strong son preferences in the study region [35, 36], we considered heterogeneous  
43  
44 182 effects for boys and girls. Further, we investigated heterogeneous effects by ANC take-up, as a  
45  
46 183 proxy for health preferences, caste categories, maternal literacy levels and gestational trimester  
47  
48 184 at the time of the baseline survey.

49 185 As child anemia could be a result as well as a mediator for pregnancy anemia, we tested the  
50  
51 186 association between childhood Hb levels and early childhood development and infectious  
52  
53 187 diseases in separate analyses. Using the same set of covariates as described above, we  
54  
55  
56  
57

---

58  
59  
60 <sup>2</sup> We did not include those variables in the main specification due to missing information, which would have further reduced the sample size. A *panchayat* is a subdivision of a block and comprises several villages.

188 controlled for household level and child specific characteristics that might affect both child Hb  
189 levels and the outcome variables of interest.

190 Finally, given the existing evidence of maternal anemia for adverse pregnancy outcomes, we  
191 conducted a survival analysis that assessed whether the Hb level of pregnant women correlates  
192 with child loss. Such a correlation would downward biased the estimates of our main analysis,  
193 as worst of children would systematically be missing in the group with higher exposure. We  
194 tested this hypothesis by estimating a probit model for non-survival on the pregnancy anemia  
195 and hemoglobin levels.

196 All estimations were weighted with inverse probability weight, as proposed by Fitzgerald,  
197 Gottschalk and Moffitt (1998) adjusting the sample for selective attrition.[37] The statistical  
198 analyses were conducted with the statistical software Stata 16 (StataCorp LP).

## 199 RESULTS

### 200 Sample description

201 The final sample consisted of 941 to 1000 mother-child-dyads, depending on the outcome  
202 variable. In 2017, the age of the children lied between 22 and 32 months. **Table 1** presents the  
203 explanatory variable, covariates and the outcome variables of interest of the estimation sample  
204 separately for three anemia categories: no pregnancy anemia (column 1-3), mild pregnancy  
205 anemia (column 4-6) and moderate-to-severe pregnancy anemia (column 7-9).

206 The distribution shown in the table is suggestive of a gradient in child Hb levels and growth  
207 indicators across pregnancy anemia levels. We do not observe a clear trend for the skill  
208 outcomes or disease incidences. Interestingly, the distribution of Hb levels of women after  
209 pregnancy across the anemia groups mirrors the Hb levels during pregnancy suggesting that  
210 suboptimal micronutrient intake during pregnancy continued after delivery. This is however  
211 not the case for the household food diversity scores, which is the highest for the mild pregnancy  
212 anemia group.

213

214

215 **Table 1 Summary statistics across exposure categories in the Hb sample**

|                                             | No<br>preg. anemia |        |     | Mild<br>preg. anemia |        |     | Moderate or severe<br>preg. anemia |        |     |
|---------------------------------------------|--------------------|--------|-----|----------------------|--------|-----|------------------------------------|--------|-----|
|                                             | Mean               | SD     | N   | Mean                 | SD     | N   | Mean                               | SD     | N   |
| <i>Outcome variables</i>                    |                    |        |     |                      |        |     |                                    |        |     |
| Hb (child) in 2017                          | 10.97              | (1.35) | 292 | 10.71                | (1.23) | 305 | 10.26                              | (1.39) | 344 |
| Motor skills z-score                        | -0.02              | (1.04) | 284 | -0.04                | (1.00) | 298 | 0.07                               | (0.93) | 335 |
| Language skills z-score                     | 0.01               | (0.96) | 291 | -0.01                | (1.00) | 304 | 0.00                               | (1.02) | 344 |
| Cognition skills z-score                    | -0.01              | (0.99) | 290 | -0.04                | (1.02) | 304 | 0.07                               | (0.97) | 340 |
| Socio-emo. skills z-score                   | 0.01               | (0.98) | 291 | -0.02                | (1.00) | 304 | -0.02                              | (1.02) | 342 |
| Height-for-age z-score                      | -2.36              | (1.39) | 287 | -2.40                | (1.27) | 300 | -2.54                              | (1.34) | 338 |
| Weight-for-age z-score                      | -1.91              | (1.10) | 286 | -1.94                | (1.05) | 294 | -2.07                              | (1.08) | 339 |
| Weight-for-height z-score                   | -0.98              | (1.47) | 288 | -0.97                | (1.71) | 300 | -0.98                              | (1.60) | 338 |
| Respiratory disease or fever                | 0.20               | (0.40) | 291 | 0.21                 | (0.41) | 305 | 0.20                               | (0.40) | 344 |
| Diarrhea incidence                          | 0.24               | (0.43) | 287 | 0.25                 | (0.43) | 304 | 0.26                               | (0.44) | 344 |
| <i>Other child characteristics</i>          |                    |        |     |                      |        |     |                                    |        |     |
| Age of child (months)                       | 27.27              | (2.43) | 292 | 27.26                | (2.41) | 305 | 27.54                              | (2.16) | 344 |
| Currently breastfed                         | 0.44               | (0.50) | 292 | 0.46                 | (0.50) | 305 | 0.44                               | (0.50) | 344 |
| Sex (Male=1)                                | 0.53               | (0.50) | 292 | 0.50                 | (0.50) | 305 | 0.53                               | (0.50) | 344 |
| <i>Pregnancy characteristics</i>            |                    |        |     |                      |        |     |                                    |        |     |
| Hb (preg.)                                  | 11.76              | (0.72) | 292 | 10.44                | (0.29) | 305 | 8.68                               | (1.07) | 344 |
| Trimester of pregnancy                      | 1.89               | (0.76) | 292 | 2.01                 | (0.69) | 305 | 2.16                               | (0.69) | 344 |
| First pregnancy                             | 0.22               | (0.42) | 292 | 0.22                 | (0.41) | 305 | 0.19                               | (0.40) | 344 |
| Any ANC visits                              | 0.53               | (0.50) | 292 | 0.48                 | (0.50) | 305 | 0.55                               | (0.50) | 344 |
| Supplementary iron intake during pregnancy  | 0.61               | (0.49) | 292 | 0.60                 | (0.49) | 305 | 0.57                               | (0.50) | 344 |
| Other micronutrient intake during pregnancy | 0.43               | (0.50) | 259 | 0.40                 | (0.49) | 265 | 0.44                               | (0.50) | 306 |
| <i>Mother characteristics</i>               |                    |        |     |                      |        |     |                                    |        |     |
| Hb (mother) in 2017                         | 12.09              | (1.32) | 292 | 11.86                | (1.35) | 305 | 11.14                              | (1.62) | 344 |
| Mother can read                             | 0.25               | (0.43) | 292 | 0.27                 | (0.44) | 305 | 0.24                               | (0.43) | 344 |
| Age of mother (years)                       | 24.65              | (3.66) | 292 | 24.90                | (3.89) | 305 | 24.67                              | (3.93) | 344 |
| <i>Household characteristics</i>            |                    |        |     |                      |        |     |                                    |        |     |
| Food diversity index                        | 7.01               | (1.50) | 292 | 7.30                 | (1.46) | 305 | 7.10                               | (1.52) | 344 |
| Scheduled case or tribe                     | 0.29               | (0.46) | 284 | 0.29                 | (0.46) | 295 | 0.33                               | (0.47) | 331 |
| Improved sanitation facility                | 0.14               | (0.34) | 292 | 0.12                 | (0.33) | 305 | 0.12                               | (0.32) | 344 |
| Asset index quintile                        | 3.09               | (1.44) | 292 | 3.01                 | (1.42) | 305 | 2.85                               | (1.45) | 344 |

216

217 The majority of women in our sample (69%) were at least mildly or moderately anemic during  
218 pregnancy, with an average Hb level of 10.2 g/dl. Of all anemic women, 48% showed signs of  
219 moderate anemia, and only 4% severe anemia. Overall, the literacy level of the study population  
220 was low with a quarter of the women being able to read and write, similar in all three presented  
221 anemia groups. Such low levels of literacy are comparable with district-wide statistics of a  
222 nationally representative survey from 2015-16.[28] Importantly, half of the women reported  
223 not having received any ANC during pregnancy. This figure sets our sample strongly apart from  
224 most existing studies, many of which recruited their participants during ANC visits [20, 26, 38]  
225 or delivered ANC visits as part of the study [25]. The uptake of ANC services is the highest in

226 the group of moderate or severe pregnancy anemia and lowest for women of mild pregnancy  
227 anemia.

228 The sample size during follow-up data collection reduced considerably from the baseline  
229 (N=1,918) due to the unavailability of the women or children at the time follow-up visits,  
230 inaccurate location information, refusal to provide a blood sample or to participate in the child  
231 testing, and child death (**Figure 1**). We account for this loss in sample size by using inverse  
232 probability weights, assigning higher weights to those households that had a higher probability  
233 of dropping out.<sup>3</sup>

234 - *Figure 1 here* -

### 235 **Association of pregnancy anemia with childhood anemia and early skills**

236 We found a strong association of Hb during pregnancy, mild, and moderate or severe pregnancy  
237 anemia with the child's hemoglobin levels (**Table 2**). An increase of 1 g/dl in Hb during  
238 pregnancy was associated with 0.17 g/dl higher Hb levels in the offspring. Children born to  
239 women with mild anemia had 0.20 g/dl lower Hb level than their non-anemic peers did. The  
240 coefficient was more than twice the size for children born to mothers with moderate or severe  
241 pregnancy anemia. Current HB of the mothers are consistently positively correlated with the  
242 child Hb levels, at a statistical significance level of 1%.

---

<sup>3</sup> Relevant weighting variables were used despite missing information, which reduces the estimation samples by two more observations.

**Table 2 Weighted regression results on the association between maternal hemoglobin (Hb) levels and anemia during pregnancy and early childhood development and childhood hemoglobin levels**

|                              | Hb (child)                | Motor skills          | Language skills       | Cognition skills       | Socio-emo. skills     |
|------------------------------|---------------------------|-----------------------|-----------------------|------------------------|-----------------------|
| <i>Panel A</i>               |                           |                       |                       |                        |                       |
| Hb (preg.)                   | 0.17***<br>[0.11,0.23]    | -0.01<br>[-0.05,0.03] | -0.01<br>[-0.05,0.04] | -0.03*<br>[-0.07,0.00] | -0.02<br>[-0.05,0.02] |
| Hb (mother)                  | 0.13***<br>[0.07,0.20]    | 0.01<br>[-0.03,0.05]  | 0.04<br>[-0.01,0.08]  | 0.06***<br>[0.02,0.10] | 0.05**<br>[0.01,0.10] |
| R <sup>2</sup>               | 0.174                     | 0.246                 | 0.218                 | 0.303                  | 0.321                 |
| <i>Panel B</i>               |                           |                       |                       |                        |                       |
| Mild preg. anemia            | -0.20*<br>[-0.41,0.00]    | 0.03<br>[-0.13,0.19]  | 0.01<br>[-0.13,0.15]  | 0.06<br>[-0.09,0.22]   | 0.05<br>[-0.08,0.17]  |
| Moderate/severe preg. anemia | -0.57***<br>[-0.78,-0.36] | 0.06<br>[-0.10,0.22]  | 0.03<br>[-0.12,0.19]  | 0.12*<br>[-0.02,0.26]  | 0.01<br>[-0.12,0.15]  |
| Hb (mother)                  | 0.15***<br>[0.08,0.22]    | 0.01<br>[-0.03,0.05]  | 0.04*<br>[-0.01,0.08] | 0.06***<br>[0.02,0.10] | 0.05**<br>[0.00,0.09] |
| R <sup>2</sup>               | 0.172                     | 0.246                 | 0.218                 | 0.303                  | 0.321                 |
| Controls                     | Yes                       | Yes                   | Yes                   | Yes                    | Yes                   |
| Tester fixed effects         | Yes                       | No                    | No                    | No                     | No                    |
| FREDI fixed effects          | No                        | Yes                   | Yes                   | Yes                    | Yes                   |
| N                            | 939                       | 972                   | 996                   | 990                    | 994                   |

*Notes:* Outcome variables in column (2)-(5) are standardized test scores and the coefficients are shown in standard deviations. *Panel A* uses pregnancy Hb level of the mother as main explanatory variable. In *Panel B*, the two explanatory variables of interest are mild pregnancy anemia and moderate/severe pregnancy anemia. The omitted category in Panel B is no pregnancy anemia. 95% Confidence intervals using standard errors clustered on village level are in parentheses. Included control variables: caste category, wealth quintile, food diversity in 2017, breast feeding, maternal age and literacy, first pregnancy (dummy), trimester of pregnancy, ANC visit (dummy), child's sex and age, and block dummies. Additional control variable in skill estimation: test version. Tester fixed effects are anthropometric test conductor fixed effects. FREDI fixed effects are child development test conductor fixed effects. Hemoglobin is measured in g/dl. Conventional significance level: \* p<0.1, \*\* p<0.05, \*\*\* p<0.01.

1  
2  
3  
4  
5 246 We did not find a statistically significant relationship of Hb or any type of pregnancy anemia  
6  
7 247 with the child development in general, or any specific dimension of development. The  
8  
9 248 coefficients were small in magnitude, indicating indeed zero-effects, rather than an imprecise  
10  
11 249 estimation. For cognitive development, we found a small, negative and weakly statistically  
12  
13 250 significant association with Hb level during pregnancy and moderate or severe pregnancy  
14  
15 251 anemia.

16  
17 252 The heterogeneity analyses showed that there were only small differences in the estimates of  
18  
19 253 pregnancy Hb on child Hb and skills on by gestational trimester, caste category, maternal  
20  
21 254 literacy, sex and ANC take-up (**Supplemental Table S1**). In the case of language skills, we  
22  
23 255 found a small, weakly statistically significant, negative interaction effect with ANC visits and  
24  
25 256 a statistically significant, but positive interaction term for households belonging to a scheduled  
26  
27 257 caste or tribe. Hence, for scheduled castes and tribes, we find evidence for a positive correlation  
28  
29 258 of pregnancy anemia and early language skills.

30  
31 259 Our findings were robust to the inclusion of additional, potentially confounding, covariates,  
32  
33 260 namely birth spacing, body-mass-index and postnatal depression, panchayat fixed effects, and  
34  
35 261 the exclusion of all covariates and fixed effects (**Supplemental Table S2 and S3**). We found  
36  
37 262 no evidence for survival bias, i.e. that the surviving children were exposed to higher maternal  
38  
39 263 Hb levels in-utero (**Supplemental Table S4**).

#### 40 264 **Association of pregnancy anemia and child health indicators**

41  
42 265 We found no indication that suboptimal Hb levels during pregnancy were associated with  
43  
44 266 stunting, wasting or underweight of children, or increased the incidence of respiratory diseases  
45  
46 267 or diarrhea (**Figure 2**).

47  
48 268 *- Figure 2 here -*

49  
50  
51 269

270

### 271 Association of childhood anemia with skill and child health

272 The lack of association between pregnancy anemia, early skills and infectious diseases, despite  
 273 the strong correlation with early Hb levels, might be an indication that *childhood* anemia is not  
 274 a risk factor for early childhood development or disease incidence in our study population. The  
 275 cross-sectional analysis confirmed this hypothesis for diarrheal and respiratory diseases (**Table**  
 276 **3**). Yet, for the cumulative development scores, we found a small, but positive and statistically  
 277 significant coefficient.

278 **Table 3. Association of child's hemoglobin (Hb) with their early skills and infectious**  
 279 **disease incidence**

|                           | Cum. development z-<br>score | Respiratory disease | Diarrhea            |
|---------------------------|------------------------------|---------------------|---------------------|
|                           | Marginal effects             | Odds ratios         | Odd ratios          |
| Hb (child)                | 0.04***<br>[0.01,0.08]       | 1.02<br>[0.89,1.16] | 0.99<br>[0.88,1.11] |
| Hb (mother)               | 0.02<br>[-0.01,0.05]         | 1.00<br>[0.89,1.12] | 0.98<br>[0.88,1.08] |
| (Adjusted) R <sup>2</sup> | 0.334                        | 0.061               | 0.047               |
| Controls                  | Yes                          | Yes                 | Yes                 |
| Tester fixed effects      | Yes                          | Yes                 | Yes                 |
| FREDI fixed effects       | Yes                          | No                  | No                  |
| N                         | 915                          | 938                 | 933                 |

Notes: The outcome variable in column (1) is the standardized total test score and the coefficients are shown in standard deviations. Outcomes in column (2) and (3) are binary variables and the coefficient are shown as odds ratios. 95% Confidence intervals using standard errors clustered on village level are in parentheses. Included control variables: caste category, wealth quintile, food diversity in 2017, breast feeding, maternal age and literacy, first pregnancy (dummy), trimester of pregnancy, ANC visit (dummy), child's sex and age, and block dummies. Additional control variable in column (1) and (2): test version. Tester fixed effects are anthropometric test conductor fixed effects. FREDI fixed effects are child development test conductor fixed effects. Hemoglobin is measured in g/dl.. Conventional significance level: \* p<0.1, \*\* p<0.05, \*\*\* p<0.01.

280

## 281 DISCUSSION

### 282 Interpretation

283 Our cohort study from rural Bihar, India, shows a strong association between maternal  
 284 hemoglobin levels during pregnancy and the hemoglobin levels of the offspring between 22  
 285 and 32 months after birth. The association is strongly statistically significant and robust to the  
 286 inclusion of several, potentially confounding, variables, such as current nutritional status of the  
 287 mother or child age. The relationship does not differ by child sex, caste category, gestational  
 288 trimester, ANC take-up or maternal literacy. Moderate and severe pregnancy anemia is  
 289 associated with lower Hb levels of children than mild pregnancy anemia.



290 Our analysis extends the current literature that connects pregnancy anemia with direct birth  
291 outcomes in India, such as prematurity birth weight and size. [39, 40] The biological link  
292 between pregnancy anemia and child anemia more than two years after birth is unclear as the  
293 iron transferred from mother to child in-utero is typically consumed by the child's needs within  
294 the first year of life, before complementary feeding starts. [10] Our findings might be explained  
295 by a lower Hb trajectory since birth, initiated by the low hemoglobin environment in-utero as  
296 has been shown in Benin.[11]

297 Overall, our findings on childhood anemia are in line with a recent study from the US, that  
298 showed an elevated risk ratio of infant anemia from anemia during pregnancy, in particular for  
299 moderate and severe anemic condition.[14] Similarly, an analysis with data from China showed  
300 reduced Hb levels of infants for maternal anemia during the 24 - 28 gestational week, the  
301 authors find however no association for the first gestational trimester.[15]

302 We did not find any correlation between low Hb level during pregnancy and other child health  
303 outcomes, such disease incidence or growth indicators. The disadvantage of children born to  
304 anemic mothers, compared to their peers, hence seems to be limited to the low Hb levels. Our  
305 study does also not show any association between *childhood* Hb and infectious diseases, even  
306 though iron deficiency, a major cause of anemia, is known to weaken the immune functions.[41]  
307 In this regard, our findings contradict a study on Bedouin children in Israel, presenting a strong  
308 linkage between anemia, diarrhea and respiratory illnesses of children.[42]

309 Lastly, we find no evidence that pregnancy anemia is associated with lower early childhood  
310 development, even though children's Hb levels do correlate with early skills in our sample. Our  
311 results thereby go against the outcomes of several observational studies, most prominently  
312 Chang et al.'s analysis in rural China, with children as a similar age. While they did not find an  
313 association of pregnancy anemia and psychomotor development, children of anemic mothers  
314 showed lower scores in language and cognitive development when 18 and 24 months old.[25]

315 Differences in the socio-economic characteristics of two study populations might explain this  
316 difference. Not only did the mothers in Chang et al.'s study have higher levels of education, but  
317 the prevalence of childhood undernutrition among them was about a fifth as large as in our  
318 study population. The poor nutritional status of children in Madhepura is likely not only a result  
319 of the insufficient intake of macro- and micronutrients but also of frequent gastrointestinal  
320 infections. The low coverage of improved toilet facilities and high prevalence of unsafe disposal

1  
2  
3 321 of children's stool possibly led to greater exposure to fecal bacteria, thus facilitating the spread  
4  
5 322 of diarrheal diseases and parasites. The constant exposure to fecal bacteria could also cause  
6  
7 323 environmental enteropathy which hampers the absorption of nutrients and worsens  
8  
9 324 malnutrition.[43–45]

10  
11 325 Furthermore, it is important to note that the human brain development is largely driven by  
12  
13 326 experience.[46] A lack of adequate learning opportunities and stimulation in the early years can  
14  
15 327 have long lasting consequences for the functioning of the brain.[47, 48] The stimulation  
16  
17 328 environment created by the caregivers for their children is limited in our study area. Only about  
18  
19 329 half of the caregivers told stories, sung songs or read a book to the children during the three  
20  
21 330 days prior to the survey. About a quarter of the mothers reported that no household member  
22  
23 331 had played with the child in that time.

24 332 Taken together, all of these lead us to argue that the additional, possible adverse impact of  
25  
26 333 pregnancy anemia on child development in our study setting was not large enough to be  
27  
28 334 detectable in our estimations.

### 30 335 **Limitations**

31  
32  
33 336 Our analysis is based on the assumption that the single hemoglobin measure taken at baseline  
34  
35 337 is informative of the hemoglobin status during the full course of pregnancy. Most Hb  
36  
37 338 measurements of our participants were taken in the second trimester, allowing sufficient time  
38  
39 339 for any improvement in the Hb levels during the remaining months. Such improvements after  
40  
41 340 the baseline data collection would hence weaken the relationship of Hb that we measured with  
42  
43 341 child outcomes. Given that half of the mothers in our sample reported not having consumed  
44  
45 342 any iron supplements during pregnancy or received any antenatal care, we believe that the  
46  
47 343 extent of such attenuation bias is limited.

48 344 Any systematic error in Hb measurement, depending on the Hb level, could be a bigger concern.  
49  
50 345 This could have been induced by the differential recommendations our field team gave based  
51  
52 346 on the blood test results. However, our data do not support this hypothesis. We did not observe  
53  
54 347 a particular behavior change in more severely anemic women: even after delivery only 57% of  
55  
56 348 the women with moderate or severe pregnancy anemia reported consuming iron supplements  
57  
58 349 during pregnancy, compared to 60-61% in the mildly and non-anemic group. During  
59  
60 350 pregnancy, the reported supplementation rates across the groups were as well similar (16% of

1  
2  
3 351 the moderately or severely anemic women vs. 19-20% of the mildly or non-anemic women).  
4  
5 352 This suggests that our advice did not alter the women's behavior.  
6

7  
8 353 Two additional points should be kept in mind when interpreting our findings. First, we collected  
9  
10 354 Hb levels but not ferritin levels, which leaves room for speculation on the origin of anemia in  
11  
12 355 the study sample. Although iron deficiency is commonly believed to be the major reason for  
13  
14 356 anemia, to our knowledge, no study has documented the actual share of iron deficiency anemia  
15  
16 357 among the anemic pregnant women in rural Bihar. Second, it should be noted that the share of  
17  
18 358 severely anemic pregnant women in our study is very small. Our estimated association of  
19  
20 359 moderate or severe anemia and child development and Hb is hence mainly attributable to the  
21  
22 360 group of women who were moderately anemic during pregnancy.

## 22 361 **Conclusion**

23  
24  
25 362 We find strong evidence that pregnancy anemia is a risk factor for childhood anemia but not  
26  
27 363 for any deficiency in the development of early skills, on average. The relationship between  
28  
29 364 pregnancy anemia and childhood Hb grows stronger with lower levels of Hb during pregnancy.  
30  
31 365 Yet, diarrhea or respiratory disease incidence or child growth is not affected by either childhood  
32  
33 366 Hb or pregnancy Hb. The strong association between pregnancy anemia and childhood anemia  
34  
35 367 should be further investigated to observe if it will affect later life outcomes, commonly  
36  
37 368 associated with iron deficiency and anemia.

38 369  
39  
40  
41  
42  
43  
44  
45  
46  
47  
48  
49  
50  
51  
52  
53  
54  
55  
56  
57  
58  
59  
60

1  
2  
3 370  
4  
5

6 371 **Author contribution:** EH, MAS and SV designed research and the survey instruments, CM  
7 372 designed the child skill assessment. SV and MAS coordinated the first wave data collection,  
8 373 EH coordinated and supervised the second wave data collection, with the support by CM for  
9 374 the child testing. EH analyzed the data, wrote the paper, had primary responsibility for final  
10 375 content. All authors have read and approved the final manuscript.

11 376 **Acknowledgement:** The authors acknowledge the immensely helpful contribution during the  
12 377 data collections and advice of Cara Ebert, Abhijeet Kumar, and Mareike Schön.

13 378 **Funding:** This work was supported by the German Research Foundation (DFG) (Research  
14 379 Training Group 1723) and 3ie International Initiative for Impact Evaluation (CPW.01.GV.IE).  
15 380 The study was prepared in parts during the PhD Fellowship at the United Nations University  
16 381 World Institute for Development Economic Research (UNUWIDER)

17 382 **Competing interests:** None declared.

18 383 **Patient consent for publication:** Not required.

19 384 **Ethics approval:** The study was approved by the ethics board of the IIT Gandhinagar  
20 385 (IEC/2014-15/2/MS/006, IEC/2016-17/2/MS/025) and the University of Goettingen (no IRB  
21 386 number available). We obtained written informed consent for the interviews, growth  
22 387 measurements, blood sample collections and the child development testing during each wave.

23 388 **Data availability statement:** No additional data available.  
24  
25  
26  
27  
28  
29  
30  
31  
32  
33  
34  
35  
36  
37  
38  
39  
40  
41  
42  
43  
44  
45  
46  
47  
48  
49  
50  
51  
52  
53  
54  
55  
56  
57  
58  
59  
60

## REFERENCES

1. Morgane PJ, Austin-LaFrance R, Bronzino J, Tonkiss J, Díaz-Cintra S, Cintra L, et al. Prenatal malnutrition and development of the brain. *Neuroscience & Biobehavioral Reviews*. 1993;17:91–128.
2. Stevens GA, Finucane MM, De-Regil LM, Paciorek CJ, Flaxman SR, Branca F, et al. Global, regional, and national trends in haemoglobin concentration and prevalence of total and severe anaemia in children and pregnant and non-pregnant women for 1995–2011: a systematic analysis of population-representative data. *The Lancet Global Health*. 2013;1:e16–25.
3. Balarajan Y, Ramakrishnan U, Özaltin E, Shankar AH, Subramanian S. Anaemia in low-income and middle-income countries. *The Lancet*. 2011;378:2123–35.
4. Pasricha S-R, Black J, Muthayya S, Shet A, Bhat V, Nagaraj S, et al. Determinants of Anemia Among Young Children in Rural India. *PEDIATRICS*. 2010;126:e140–9.
5. Allen LH. Biological Mechanisms That Might Underlie Iron's Effects on Fetal Growth and Preterm Birth. *The Journal of Nutrition*. 2001;131:581S-589S.
6. Burke R, Leon J, Suchdev P. Identification, Prevention and Treatment of Iron Deficiency during the First 1000 Days. *Nutrients*. 2014;6:4093–114.
7. de Pee S, Bloem MW, Sari M, Kiess L, Yip R, Kosen S. The High Prevalence of Low Hemoglobin Concentration among Indonesian Infants Aged 3–5 Months Is Related to Maternal Anemia. *The Journal of Nutrition*. 2002;132:2215–21.
8. Shao J, Lou J, Rao R, Georgieff MK, Kaciroti N, Felt BT, et al. Maternal Serum Ferritin Concentration Is Positively Associated with Newborn Iron Stores in Women with Low Ferritin Status in Late Pregnancy. *The Journal of Nutrition*. 2012;142:2004–9.
9. Rahman MM, Abe SK, Rahman MS, Kanda M, Narita S, Bilano V, et al. Maternal anemia and risk of adverse birth and health outcomes in low- and middle-income countries: systematic review and meta-analysis. *Am J Clin Nutr*. 2016;103:495–504.
10. Chaparro CM. Setting the Stage for Child Health and Development: Prevention of Iron Deficiency in Early Infancy. *The Journal of Nutrition*. 2008;138:2529–33.
11. Koura KG, Ouédraogo S, Cottrell G, Le Port A, Massougboji A, Garcia A. Maternal Anaemia at Delivery and Haemoglobin Evolution in Children during Their First 18 Months of Life Using Latent Class Analysis. *PLoS ONE*. 2012;7:e50136.
12. Abioye AI, McDonald EA, Park S, Ripp K, Bennett B, Wu HW, et al. Maternal anemia type during pregnancy is associated with anemia risk among offspring during infancy. *Pediatr Res*. 2019;86:396–402.
13. Kumar A, Rai AK, Basu S, Dash D, Singh JS. Cord blood and breast milk iron status in maternal anemia. *Pediatrics*. 2008;121:e673-677.
14. Leslie MS, Park J, Briggs LA, El-Banna MM, Greene J. Is Anemia in Low Income Pregnant Women Related to Their Infants' Having Anemia? A Cohort Study of Pregnant Women-Infant Pairs in the United States. *Matern Child Health J*. 2020;24:768–76.

15. Zhang Y, Jin L, Liu J, Ye R, Ren A. Maternal Hemoglobin Concentration during Gestation and Risk of Anemia in Infancy: Secondary Analysis of a Randomized Controlled Trial. *The Journal of Pediatrics*. 2016;175:106-110.e2.
16. Stevens GA, Finucane MM, De-Regil LM, Paciorek CJ, Flaxman SR, Branca F, et al. Global, regional, and national trends in haemoglobin concentration and prevalence of total and severe anaemia in children and pregnant and non-pregnant women for 1995–2011: a systematic analysis of population-representative data. *The Lancet Global Health*. 2013;1:e16–25.
17. Lozoff B. Iron Deficiency and Child Development. *Food and Nutrition Bulletin*. 2007;28 4\_suppl4:S560–71.
18. Lukowski AF, Koss M, Burden MJ, Jonides J, Nelson CA, Kaciroti N, et al. Iron deficiency in infancy and neurocognitive functioning at 19 years: evidence of long-term deficits in executive function and recognition memory. *Nutritional Neuroscience*. 2010;13:54–70.
19. Janbek J, Sarki M, Specht IO, Heitmann BL. A systematic literature review of the relation between iron status/anemia in pregnancy and offspring neurodevelopment. *Eur J Clin Nutr*. 2019;73:1561–78.
20. Angulo-Barroso RM, Li M, Santos DCC, Bian Y, Sturza J, Jiang Y, et al. Iron Supplementation in Pregnancy or Infancy and Motor Development: A Randomized Controlled Trial. *PEDIATRICS*. 2016;137:e20153547–e20153547.
21. Santos DCC, Angulo-Barroso RM, Li M, Bian Y, Sturza J, Richards B, et al. Timing, duration, and severity of iron deficiency in early development and motor outcomes at 9 months. *European Journal of Clinical Nutrition*. 2018;72:332–41.
22. Tran TD, Tran T, Simpson JA, Tran HT, Nguyen TT, Hanieh S, et al. Infant motor development in rural Vietnam and intrauterine exposures to anaemia, iron deficiency and common mental disorders: a prospective community-based study. *BMC Pregnancy and Childbirth*. 2014;14. doi:10.1186/1471-2393-14-8.
23. Hanieh S, Ha TT, Simpson JA, Braat S, Thuy TT, Tran TD, et al. Effect of low-dose versus higher-dose antenatal iron supplementation on child health outcomes at 36 months of age in Viet Nam: longitudinal follow-up of a cluster randomised controlled trial. *BMJ Global Health*. 2017;2:e000368.
24. Tran TD, Biggs B-A, Tran T, Simpson JA, Hanieh S, Dwyer T, et al. Impact on Infants' Cognitive Development of Antenatal Exposure to Iron Deficiency Disorder and Common Mental Disorders. *PLoS ONE*. 2013;8:e74876.
25. Chang S, Zeng L, Brouwer ID, Kok FJ, Yan H. Effect of Iron Deficiency Anemia in Pregnancy on Child Mental Development in Rural China. *PEDIATRICS*. 2013;131:e755–63.
26. Parsons AG, Zhou SJ, Spurrier NJ, Makrides M. Effect of iron supplementation during pregnancy on the behaviour of children at early school age: long-term follow-up of a randomised controlled trial. *British Journal of Nutrition*. 2008;99. doi:10.1017/S0007114507853359.
27. Zhou SJ, Gibson RA, Crowther CA, Baghurst P, Makrides M. Effect of iron supplementation during pregnancy on the intelligence quotient and behavior of children at 4 y

of age: long-term follow-up of a randomized controlled trial. *The American Journal of Clinical Nutrition*. 2006;83:1112–7.

28. IIPS. National Family Health Survey 2015-16 District Fact Sheet Madhepura Bihar. 2017. [http://rchiips.org/NFHS/FCTS/BR/BR\\_FactSheet\\_213\\_Madhepura.pdf](http://rchiips.org/NFHS/FCTS/BR/BR_FactSheet_213_Madhepura.pdf).

29. Sharma JB, Shankar M. Anemia in Pregnancy. *JIMSA*. 2010;23:253–60.

30. World Health Organization. Haemoglobin concentrations for the diagnosis of anaemia and assessment of severity. Geneva: World Health Organization; 2011. <http://www.who.int/vmnis/indicators/haemoglobin.pdf>.

31. Albers CA, Grieve AJ. Test Review: Bayley, N. (2006). Bayley Scales of Infant and Toddler Development— Third Edition. San Antonio, TX: Harcourt Assessment. *Journal of Psychoeducational Assessment*. 2007;25:180–90.

32. Mähler C, Cartschau F, Rohleder K. Frühkindliche Entwicklungsdiagnostik für Kinder von 0-3 Jahren (FREDI 0-3). Goettingen: Hogrefe; 2016.

33. Hasselhorn M. Fredi 0–3. *Frühe Bildung*. 2017;6:101–3.

34. World Health Organization, UNICEF. WHO child growth standards and the identification of severe acute malnutrition in infants and children: a joint statement by the World Health Organization and the United Nations Children’s Fund. 2009. <http://www.ncbi.nlm.nih.gov/books/NBK200775/>. Accessed 26 Sep 2020.

35. Barcellos SH, Carvalho LS, Lleras-Muney A. Child Gender and Parental Investments In India: Are Boys and Girls Treated Differently? *American Economic Journal: Applied Economics*. 2014;6:157–89.

36. Ebert C, Vollmer S. Early childhood development and the heterogeneity in idiosyncratic son preferences for the next born child in India. Manuscript. 2018.

37. Fitzgerald J, Gottschalk P, Moffitt R. An Analysis of Sample Attrition in Panel Data: The Michigan Panel Study of Income Dynamics. Working Paper. National Bureau of Economic Research; 1998. doi:10.3386/t0220.

38. Mireku MO, Davidson LL, Koura GK, Ouédraogo S, Boivin MJ, Xiong X, et al. Prenatal Hemoglobin Levels and Early Cognitive and Motor Functions of One-Year-Old Children. *PEDIATRICS*. 2015;136:10.

39. Nair M, Choudhury MK, Choudhury SS, Kakoty SD, Sarma UC, Webster P, et al. Association between maternal anaemia and pregnancy outcomes: a cohort study in Assam, India. *BMJ Global Health*. 2016;1:e000026.

40. Patel A, Prakash AA, Das PK, Gupta S, Pusdekar YV, Hibberd PL. Maternal anemia and underweight as determinants of pregnancy outcomes: cohort study in eastern rural Maharashtra, India. *BMJ Open*. 2018;8:e021623.

41. Ekiz C, Agaoglu L, Karakas Z, Gurel N, Yalcin I. The effect of iron deficiency anemia on the function of the immune system. *Hematol J*. 2005;:579–83.

- 1  
2  
3 42. Levy A, Fraser D, Rosen SD, Dagan R, Deckelbaum RJ, Coles C, et al. Anemia as a risk  
4 factor for infectious diseases in infants and toddlers: Results from a prospective study. *Eur J*  
5 *Epidemiol.* 2005;20:277–84.  
6  
7 43. Kosek MN, Ahmed T, Bhutta Z, Caulfield L, Guerrant R, Houpt E, et al. Causal Pathways  
8 from Enteropathogens to Environmental Enteropathy: Findings from the MAL-ED Birth  
9 Cohort Study. *EBioMedicine.* 2017;18:109–17.  
10  
11 44. Ngure FM, Reid BM, Humphrey JH, Mbuya MN, Peltó G, Stoltzfus RJ. Water, sanitation,  
12 and hygiene (WASH), environmental enteropathy, nutrition, and early child development:  
13 making the links: WASH and ECD: making the links. *Annals of the New York Academy of*  
14 *Sciences.* 2014;1308:118–28.  
15  
16 45. Watanabe K, Petri WA. Environmental Enteropathy: Elusive but Significant Subclinical  
17 Abnormalities in Developing Countries. *EBioMedicine.* 2016;10:25–32.  
18  
19 46. Knudsen EI. Sensitive Periods in the Development of the Brain and Behavior. *Journal of*  
20 *Cognitive Neuroscience.* 2004;16:1412–25.  
21  
22 47. Prado EL, Dewey KG. Nutrition and brain development in early life. *Nutrition Reviews.*  
23 2014;72:267–84.  
24  
25 48. Walker SP, Wachs TD, Grantham-McGregor S, Black MM, Nelson CA, Huffman SL, et  
26 al. Inequality in early childhood: risk and protective factors for early child development. *The*  
27 *Lancet.* 2011;378:1325–38.  
28  
29  
30  
31  
32  
33  
34  
35  
36  
37  
38  
39  
40  
41  
42  
43  
44  
45  
46  
47  
48  
49  
50  
51  
52  
53  
54  
55  
56  
57  
58  
59  
60



**Figures**

Figure 1 Attrition between 2015 (wave 1) and 2017 (wave 2) in childhood hemoglobin and skills sample

Figure 2 Weighted regression results on the association between maternal hemoglobin (Hb) levels during pregnancy and growth and disease incidence indicators (odds ratios)

For peer review only

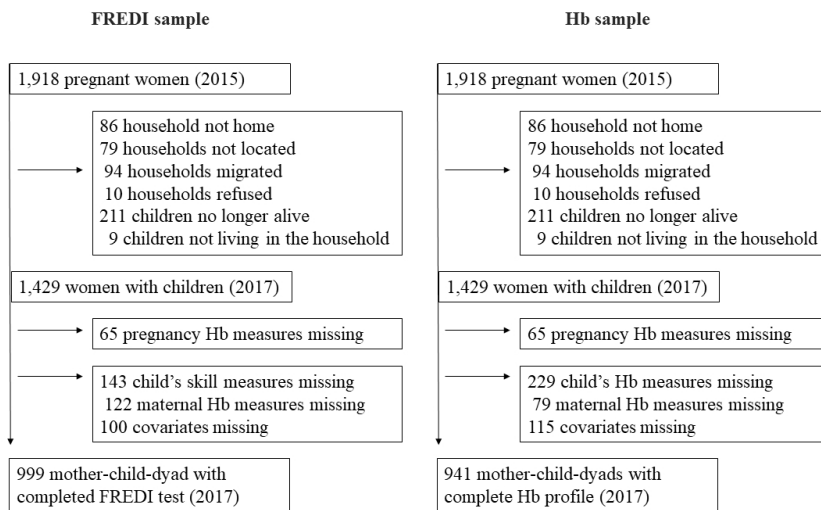

Figure 1  
Attrition between 2015 (wave 1) and 2017 (wave 2) in childhood hemoglobin and skills sample

338x190mm (96 x 96 DPI)

1  
2  
3  
4  
5  
6  
7  
8  
9  
10  
11  
12  
13  
14  
15  
16  
17  
18  
19  
20  
21  
22  
23  
24  
25  
26  
27  
28  
29  
30  
31  
32  
33  
34  
35  
36  
37  
38  
39  
40  
41  
42  
43  
44  
45  
46  
47  
48  
49  
50  
51  
52  
53  
54  
55  
56  
57  
58  
59  
60

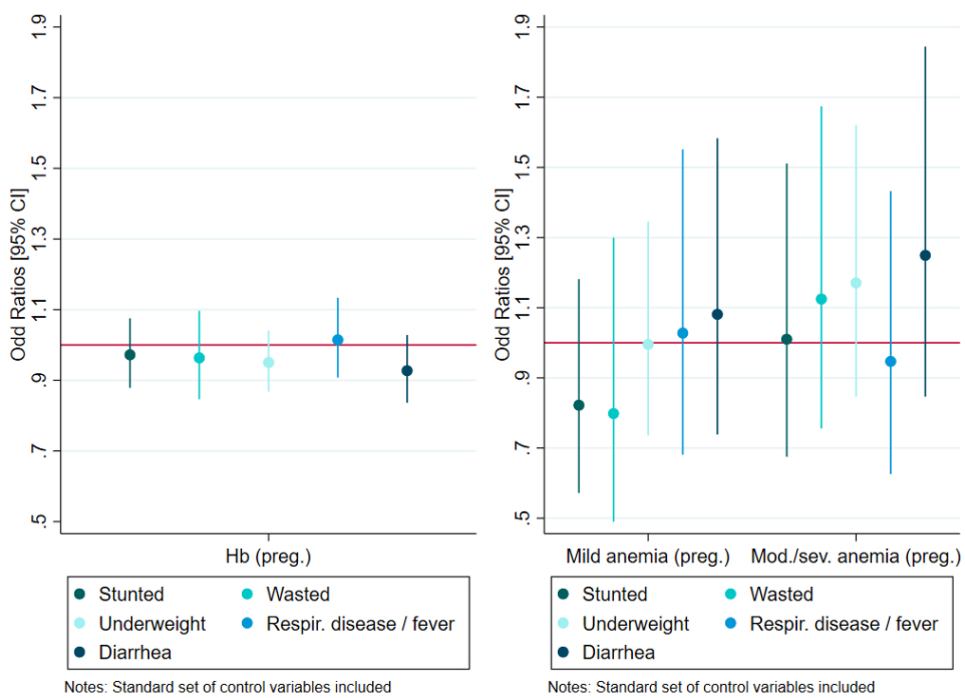

Figure 2  
 Weighted regression results on the association between maternal hemoglobin (Hb) levels during pregnancy and growth and disease incidence indicators (odds ratios)

207x151mm (129 x 129 DPI)

**Online Supporting Material**

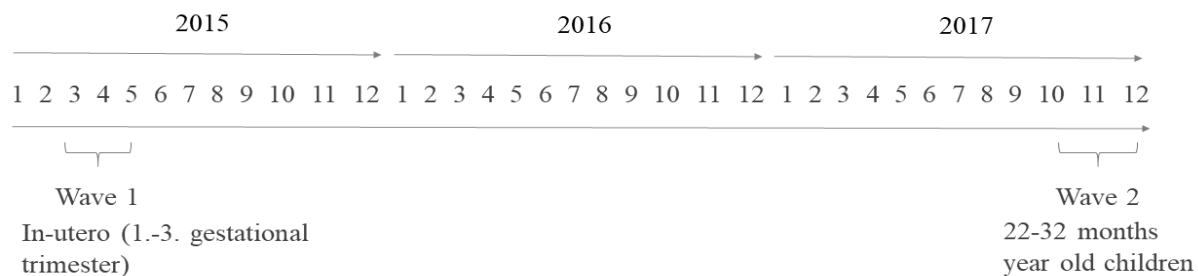

**Supplemental Figure S1 Timeline of data collections and the respective age of the children**

Review only

1  
2  
3  
4  
5  
6  
7  
8  
9  
10  
11  
12  
13  
14  
15  
16  
17  
18  
19  
20  
21  
22  
23  
24  
25  
26  
27  
28  
29  
30  
31  
32  
33  
34  
35  
36  
37  
38  
39  
40  
41  
42  
43  
44  
45  
46  
47  
48  
49  
50  
51  
52  
53  
54  
55  
56  
57  
58  
59  
60

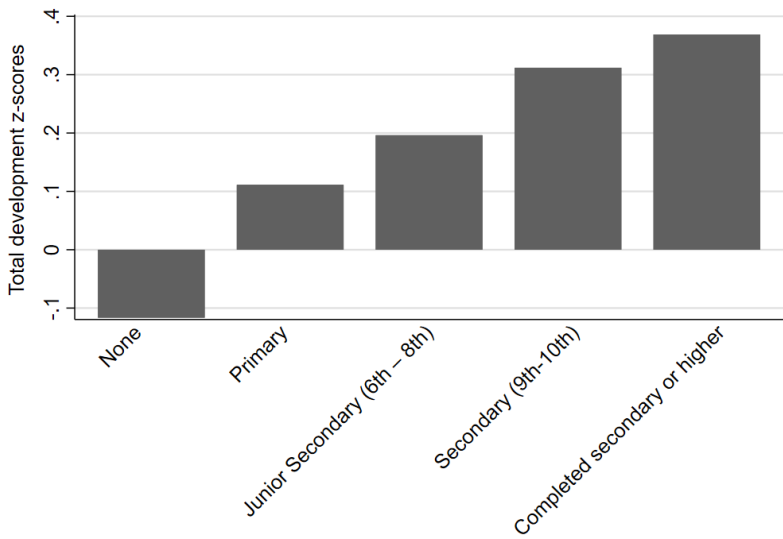

**Supplemental Figure S2 Average cumulative development test scores by maternal education category**

For peer review only

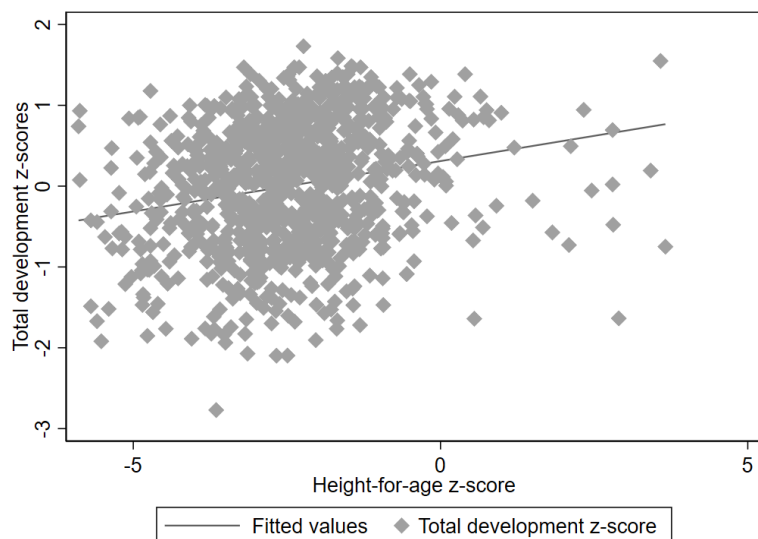

**Supplemental Figure S3 Average cumulative development test scores by of FREDI by child growth**

### Supplemental Table S1 Heterogeneous treatment effects using a linear regression model on child hemoglobin levels and skills dimensions

|                                           | Hb (child)          | Motor skills      | Language skills    | Cognition skills   | Socio-emo. skill   |
|-------------------------------------------|---------------------|-------------------|--------------------|--------------------|--------------------|
| <b>Panel A: By antenatal care uptake</b>  |                     |                   |                    |                    |                    |
| Hb (preg.)                                | 0.162***<br>(0.042) | -0.006<br>(0.029) | 0.034<br>(0.030)   | -0.029<br>(0.025)  | 0.013<br>(0.025)   |
| Any ANC # Hb (preg.)                      | 0.014<br>(0.058)    | -0.006<br>(0.035) | -0.079*<br>(0.041) | -0.007<br>(0.034)  | -0.059*<br>(0.035) |
| R <sup>2</sup>                            | 0.174               | 0.248             | 0.221              | 0.304              | 0.332              |
| N                                         | 938                 | 972               | 996                | 990                | 994                |
| <b>Panel B: By child's sex</b>            |                     |                   |                    |                    |                    |
| Hb (preg.)                                | 0.208***<br>(0.041) | 0.009<br>(0.028)  | -0.018<br>(0.025)  | -0.027<br>(0.027)  | -0.025<br>(0.024)  |
| Male # Hb (preg.)                         | -0.077<br>(0.064)   | -0.037<br>(0.037) | 0.024<br>(0.038)   | -0.009<br>(0.034)  | 0.015<br>(0.036)   |
| R <sup>2</sup>                            | 0.176               | 0.247             | 0.218              | 0.303              | 0.321              |
| N                                         | 939                 | 972               | 996                | 990                | 994                |
| <b>Panel C: By caste category</b>         |                     |                   |                    |                    |                    |
| Hb (preg.)                                | 0.164***<br>(0.033) | -0.016<br>(0.023) | -0.030<br>(0.026)  | -0.035*<br>(0.019) | -0.019<br>(0.022)  |
| Scheduled caste or tribe # Hb (preg.)     | 0.033<br>(0.079)    | 0.032<br>(0.039)  | 0.088**<br>(0.044) | 0.005<br>(0.041)   | -0.008<br>(0.039)  |
| R <sup>2</sup>                            | 0.177               | 0.245             | 0.220              | 0.306              | 0.318              |
| N                                         | 908                 | 941               | 964                | 958                | 962                |
| <b>Panel D: By maternal literacy</b>      |                     |                   |                    |                    |                    |
| Hb (preg.)                                | 0.166***<br>(0.035) | -0.011<br>(0.022) | -0.007<br>(0.023)  | -0.021<br>(0.020)  | -0.015<br>(0.021)  |
| Maternal literacy # Hb (preg.)            | 0.014<br>(0.072)    | 0.010<br>(0.050)  | 0.003<br>(0.047)   | -0.047<br>(0.047)  | -0.013<br>(0.038)  |
| R <sup>2</sup>                            | 0.174               | 0.246             | 0.218              | 0.304              | 0.321              |
| N                                         | 939                 | 972               | 996                | 990                | 994                |
| <b>Panel E: By gestational trimester</b>  |                     |                   |                    |                    |                    |
| Hb (preg.)                                | 0.173***<br>(0.054) | -0.029<br>(0.038) | -0.029<br>(0.040)  | -0.051<br>(0.037)  | -0.026<br>(0.034)  |
| Second gestational trimester # Hb (preg.) | -0.031<br>(0.077)   | 0.039<br>(0.045)  | 0.061<br>(0.047)   | 0.029<br>(0.044)   | 0.041<br>(0.046)   |
| Third gestational trimester # Hb (preg.)  | 0.027<br>(0.073)    | 0.011<br>(0.052)  | -0.010<br>(0.053)  | 0.020<br>(0.050)   | -0.031<br>(0.040)  |
| R <sup>2</sup>                            | 0.175               | 0.246             | 0.220              | 0.303              | 0.323              |
| N                                         | 939                 | 972               | 996                | 990                | 994                |
| Controls                                  | Yes                 | Yes               | Yes                | Yes                | Yes                |
| Tester fixed effects                      | Yes                 | No                | No                 | No                 | No                 |
| FREDI fixed effects                       | No                  | Yes               | Yes                | Yes                | Yes                |

Notes: Outcome variables in column (2)-(5) are standardized test scores and the coefficients are shown in standard deviations. Standard errors clustered on village level are in parentheses. Included control variables: caste category, wealth quintile, food diversity in 2017, breast feeding, maternal age and literacy, first pregnancy (dummy), trimester of pregnancy, ANC visit (dummy), child's sex and age, and block dummies. Additional control variable in column (2)-(5): test version. Tester fixed effects are anthropometric test conductor fixed effects. FREDI fixed effects are child development test conductor fixed effects. Hemoglobin is measured in g/dl. Conventional significance level: \* p<0.1, \*\* p<0.05, \*\*\* p<0.01.

**Supplemental Table S2 Linear regression model results of haemoglobin level of children on haemoglobin levels during pregnancy with additional covariates**

|                                   | Hb (child)          |
|-----------------------------------|---------------------|---------------------|---------------------|---------------------|---------------------|
| Hb (preg.)                        | 0.176***<br>(0.029) | 0.163***<br>(0.030) | 0.165***<br>(0.029) | 0.154***<br>(0.030) | 0.213***<br>(0.033) |
| Hb (mother)                       | 0.127***<br>(0.034) | 0.133***<br>(0.034) | 0.128***<br>(0.036) | 0.134***<br>(0.035) |                     |
| Mother gave birth in past 2 years | 0.013<br>(0.111)    |                     |                     |                     |                     |
| BMI (preg.)                       |                     | 0.009<br>(0.016)    |                     |                     |                     |
| Postnatal depression              |                     |                     | 0.087<br>(0.118)    |                     |                     |
| Controls                          | Yes                 | Yes                 | Yes                 | Yes                 | No                  |
| Panchayat dummies                 | No                  | No                  | No                  | Yes                 | No                  |
| Block dummies                     | Yes                 | Yes                 | Yes                 | No                  | No                  |
| N                                 | 896                 | 933                 | 807                 | 939                 | 939                 |
| R <sup>2</sup>                    | 0.173               | 0.174               | 0.161               | 0.236               | 0.054               |

Notes: Standard errors clustered on village level are in parentheses. Control variables: caste category, wealth quintile, food diversity in 2017, breast feeding, maternal age and literacy, first pregnancy (dummy), trimester of pregnancy, ANC visit (dummy), child's sex and age, tester fixed effects. Hemoglobin is measured in g/dl. Conventional significance level: \* p<0.1, \*\* p<0.05, \*\*\* p<0.01.

**Supplemental Table S3 Linear regression model results of cumulative test scores of children on haemoglobin levels during pregnancy with additional covariates**

|                                   | Cum.<br>development<br>score | Cum.<br>development<br>score | Cum.<br>development<br>score | Cum.<br>development<br>score | Cum.<br>development<br>score |
|-----------------------------------|------------------------------|------------------------------|------------------------------|------------------------------|------------------------------|
| Hb (preg.)                        | -0.023<br>(0.015)            | -0.015<br>(0.014)            | -0.009<br>(0.016)            | -0.015<br>(0.016)            | -0.008<br>(0.017)            |
| Hb (mother)                       | 0.042***<br>(0.016)          | 0.041**<br>(0.016)           | 0.036**<br>(0.017)           | 0.042**<br>(0.017)           |                              |
| Mother gave birth in past 2 years | -0.017<br>(0.050)            |                              |                              |                              |                              |
| BMI (preg.)                       |                              | 0.004<br>(0.008)             |                              |                              |                              |
| Postnatal depression              |                              |                              | 0.045<br>(0.051)             |                              |                              |
| Controls                          | Yes                          | Yes                          | Yes                          | Yes                          | No                           |
| Panchayat dummies                 | No                           | No                           | No                           | Yes                          | No                           |
| Block dummies                     | Yes                          | Yes                          | Yes                          | No                           | No                           |
| N                                 | 926                          | 966                          | 836                          | 972                          | 972                          |
| R <sup>2</sup>                    | 0.335                        | 0.325                        | 0.325                        | 0.375                        | 0.000                        |

Notes: Standard errors clustered on village level are in parentheses. Control variables: caste category, wealth quintile, food diversity in 2017, breast feeding, maternal age and literacy, first pregnancy (dummy), trimester of pregnancy, ANC visit (dummy), child's sex and age, FREDI fixed effects. Hemoglobin is measured in g/dl. Conventional significance level: \* p<0.1, \*\* p<0.05, \*\*\* p<0.01.



**Supplemental Table S4 Logit estimation results of child survival until wave 2 on hemoglobin levels and anemia status during pregnancy**

|                                | Not alive        | Not alive        | Not alive        | Not alive        |
|--------------------------------|------------------|------------------|------------------|------------------|
| Hb (preg.)                     | 1.017<br>(0.047) | 0.991<br>(0.052) |                  |                  |
| Mild anemia (preg.)            |                  |                  | 0.995<br>(0.183) | 1.012<br>(0.205) |
| Moderate/severe anemia (preg.) |                  |                  | 1.080<br>(0.195) | 1.170<br>(0.230) |
| Controls                       | No               | Yes              | No               | Yes              |
| N                              | 1821             | 1622             | 1821             | 1622             |

*Notes:* Standard errors clustered in village level are in in parentheses. The binary outcome variable equals 1 if a child had not survived from pregnancy to wave 2. The coefficients are reported in odds ratios. Column (1) and (2) uses pregnancy Hb level of the mother as main explanatory variable. In Column (3) and (4), the two explanatory variables of interest are mild pregnancy anemia and moderate/severe pregnancy anemia. The reference category in column (3) and (4) is “no pregnancy anemia” Control variables include maternal literacy, ANC visit (dummy), first pregnancy (dummy), gestational trimester, caste category and block dummies. Hemoglobin is measured in g/dl. Conventional significance level: \* p<0.1, \*\* p<0.05, \*\*\* p<0.01.

# BMJ Open

## Pregnancy anemia, child health and development: A cohort study in rural India

|                                 |                                                                                                                                                                                                                           |
|---------------------------------|---------------------------------------------------------------------------------------------------------------------------------------------------------------------------------------------------------------------------|
| Journal:                        | <i>BMJ Open</i>                                                                                                                                                                                                           |
| Manuscript ID                   | bmjopen-2020-046802.R1                                                                                                                                                                                                    |
| Article Type:                   | Original research                                                                                                                                                                                                         |
| Date Submitted by the Author:   | 30-May-2021                                                                                                                                                                                                               |
| Complete List of Authors:       | Heesemann, Esther; University of Mannheim, Economics; Center for Evaluation and Development, Mähler, Claudia; University of Hildesheim Subramanyam, Malavika; IIT Gandhinagar Vollmer, Sebastian; University of Göttingen |
| <b>Primary Subject Heading</b>: | Epidemiology                                                                                                                                                                                                              |
| Secondary Subject Heading:      | Paediatrics                                                                                                                                                                                                               |
| Keywords:                       | Nutrition < TROPICAL MEDICINE, Anaemia < HAEMATOLOGY, Epidemiology < INFECTIOUS DISEASES, Maternal medicine < OBSTETRICS, Paediatric infectious disease & immunisation < PAEDIATRICS                                      |
|                                 |                                                                                                                                                                                                                           |

SCHOLARONE™  
Manuscripts



I, the Submitting Author has the right to grant and does grant on behalf of all authors of the Work (as defined in the below author licence), an exclusive licence and/or a non-exclusive licence for contributions from authors who are: i) UK Crown employees; ii) where BMJ has agreed a CC-BY licence shall apply, and/or iii) in accordance with the terms applicable for US Federal Government officers or employees acting as part of their official duties; on a worldwide, perpetual, irrevocable, royalty-free basis to BMJ Publishing Group Ltd ("BMJ") its licensees and where the relevant Journal is co-owned by BMJ to the co-owners of the Journal, to publish the Work in this journal and any other BMJ products and to exploit all rights, as set out in our [licence](#).

The Submitting Author accepts and understands that any supply made under these terms is made by BMJ to the Submitting Author unless you are acting as an employee on behalf of your employer or a postgraduate student of an affiliated institution which is paying any applicable article publishing charge ("APC") for Open Access articles. Where the Submitting Author wishes to make the Work available on an Open Access basis (and intends to pay the relevant APC), the terms of reuse of such Open Access shall be governed by a Creative Commons licence – details of these licences and which [Creative Commons](#) licence will apply to this Work are set out in our licence referred to above.

Other than as permitted in any relevant BMJ Author's Self Archiving Policies, I confirm this Work has not been accepted for publication elsewhere, is not being considered for publication elsewhere and does not duplicate material already published. I confirm all authors consent to publication of this Work and authorise the granting of this licence.

1 **Pregnancy anemia, child health and development: A cohort study in rural India**

2 Esther Heesemann<sup>1</sup>, Claudia Mähler<sup>2</sup>, Malavika A. Subramanyam<sup>3</sup> and Sebastian Vollmer<sup>4</sup>

3 <sup>1</sup> University of Mannheim and Center for Evaluation and Development C4ED, Germany (EH)

4 <sup>2</sup> University of Hildesheim, Institute for Psychology, Germany (CM)

5 <sup>3</sup> Indian Institute of Technology (IIT) Gandhinagar, Social Epidemiology, Social Sciences,  
6 India (MAS)

7 <sup>4</sup> University of Goettingen, Department of Economics and Centre for Modern Indian Studies,  
8 Germany (SV)

9

10 Corresponding author: Esther Heesemann, O7 3, 68161 Mannheim, Germany, phone: 0049-  
11 17632603941, email: esther.heesemann@gmail.com

12

13 Word count: 4,775

14

## 15 Abstract

16 **Objective:** To assess how pregnancy anemia affects the offspring's early childhood  
17 development, child hemoglobin (Hb) levels, growth and diseases incidence outcomes two  
18 years after birth in a low-income setting. Further we investigate the mediating role of  
19 childhood Hb levels with disease incidences and skills.

20 **Design:** Prospective cohort study.

21 **Setting and participants:** The study participants are 999 mother-child dyads from rural  
22 Madhepura in Bihar, India. In 2015, the women were recruited during pregnancy from  
23 registers in mother-child centers of 140 villages for the first wave of data collection. At the  
24 time of the second wave in 2017, the children were 22-32 months old.

25 **Primary and Secondary Outcome Measures:** The recruited women were visited at home  
26 for a household survey and the measurement of the women's and child's hemoglobin level,  
27 child weight and height. Data on the incidence of diarrhea and fever were collected from  
28 interviews with the mothers. To test motor, cognitive, language and socio-emotional skills of  
29 the children, we used an adapted version of the child development assessment FREDI.

30 **Results:** The average Hb during pregnancy was 10.2 g/dl and 69% of the women had  
31 pregnancy anemia. At the age of 22-32 months, a 1 g/dl increase in Hb during pregnancy was  
32 associated with a 0.17 g/dl (95% CI: 0.11- 0.23) increase in Hb levels of the child. Children of  
33 moderately or severely anemic women during pregnancy showed 0.57 g/dl (95% CI: -0.78 - -  
34 0.36) lower Hb than children of not anemic women. We find no association between the  
35 maternal Hb during pregnancy and early skills, stunting, wasting, underweight, or disease  
36 incidence.

37 **Conclusions:** While pregnancy anemia is a risk factor for anemia during childhood, we do  
38 not find evidence for an increased risk of infectious diseases or early childhood development  
39 delays.

40 **Keywords:** Pregnancy, anemia, hemoglobin, early childhood development, motor skills,  
41 cognitive skills, language skills, socio-emotional skills, child health, India

## 44 STRENGTHS AND LIMITATIONS OF THIS STUDY

- 45 • The study used a unique cohort of women and their newborn children.
- 46 • We controlled for maternal Hb and household food security after pregnancy, together  
47 with other relevant confounders factors.
- 48 • The data contains only one measure of Hb during pregnancy and the attrition between  
49 the waves is high.

50

## 51 INTRODUCTION

52 Sufficient intake of macro- and micronutrients during pregnancy is a prerequisite for healthy  
53 child development.[1] Yet, the high rates of pregnancy anemia, i.e. having a low level of  
54 hemoglobin level in the blood, document the precarious state of nutrition among many pregnant  
55 women worldwide. In 2011, 32 million women were estimated to be anemic, the vast majority  
56 living in South Asia.[2] One of the most common causes of anemia in low- and middle-income  
57 countries, such as India, is iron deficiency.[3, 4] Anemia can however also result from other  
58 micronutrient deficiencies such as folic acid, vitamin B12, and vitamin A, as well as infectious  
59 diseases and genetic disorders. A focus on anemia is imperative because hemoglobin (Hb) is a  
60 crucial ingredient of red blood cells and thereby responsible for the transport of oxygen to the  
61 body tissues. Low hemoglobin during pregnancy is a known risk factor for premature birth, low  
62 birth weight, and in extreme cases leads to death.[5–9] Yet, also high hemoglobin levels,  
63 especially in the first trimester, are associated with adverse birth outcomes, suggesting a U-  
64 shaped relationship. [10]

65 In this paper, we investigate the consequences of pregnancy anemia on child Hb levels, early  
66 skills and other health indicators in the first 1,000 days. Most of the iron requirement in the first  
67 year of life is met by the body iron a child is born with, either in the form of hemoglobin or in  
68 iron stores (ferritin). The amount of ferritin and hemoglobin at birth depends heavily on the  
69 iron transfer from mother to child in-utero, which occurs in the second and third trimester of  
70 pregnancy.[11] Studies have shown that anemia during pregnancy correlates with low cord  
71 hemoglobin levels and anemia during infancy.[12–17] To our knowledge, there are no studies  
72 investigating the relationship of pregnancy anemia and anemia of children older than 18  
73 months. Yet, with a prevalence of 58%, anemia of children below the age of five remains a  
74 significant global health challenge in South Asia and its causes are worth investigating.[18] The

75 known adverse consequences of childhood anemia on human development, in particular  
76 cognitive health, add importance to this matter.[17, 19, 20]

77 While several experimental and non-experimental studies have examined the impact of  
78 pregnancy anemia or iron deficiency on early skills, the empirical findings are inconclusive.  
79 [21, 22] This might be a result of the different study design, age variation of the study  
80 participants, the dimensions of skills measured, or geographical diversity.[23–30] Furthermore,  
81 as pregnancy anemia is a risk for adverse birth outcomes, the existing experimental studies  
82 exclude moderately and severely anemic women from the trials. Hence, the external validity of  
83 their findings for the general population of pregnant women is unclear. Observational studies  
84 without the appropriate quasi-experimental methods are unable to identify a causal impact of  
85 anemia during pregnancy on child outcomes due to omitted, endogenous variables. For  
86 instance, ignoring time-invariant environmental factors is likely to upwardly bias the results of  
87 non-experimental studies.

88 We contribute to the existing literature by analyzing the consequences of pregnancy anemia on  
89 child outcomes in three essential ways. First, we eliminate an important confounder in the  
90 analysis by controlling for the maternal hemoglobin levels and the food diversity of the  
91 household after birth. While not being able to fully capture the unobservable differences  
92 between children exposed to pregnancy anemia and without, our set of covariates will omit the  
93 bias emerging from any differences in micronutrient diversity in the post-natal period. Second,  
94 by following the children more than two years after birth, we can observe if potential initial  
95 disadvantages persisted over time. Lastly, in addition to cognitive and non-cognitive functions,  
96 and anemia, we also assess the influence of pregnancy anemia on secondary health outcomes,  
97 namely child growth and disease incidence. This analysis will help to get a deeper  
98 understanding of the adverse consequences of anemia during pregnancy.

## 99 **METHODS**

### 100 **Data and procedures**

101 Our dataset is a panel of two waves, consisting of household surveys, anthropometric and blood  
102 sample collections, and child development tests conducted in Madhepura in the North-Eastern  
103 state Bihar. Bihar is one of the poorest states of India and Madhepura belongs to its socio-  
104 economically most deprived districts. Our study sample was taken from pregnancy registers in  
105 local mother-child-centers (*Anganwadi* centers) in 140 villages in six sub-districts (blocks) of

1  
2  
3 106 Madhepura. It should hence be noted that our sample is not representative of the full population  
4  
5 107 of pregnant women in that area, but only for those who registered in the centers. In 2015/16,  
6  
7 108 this covered 76% of pregnant women.[31]  
8

9  
10 109 All women listed in the registries in March/April 2015 were visited by teams of trained, local  
11  
12 110 survey enumerators, medical data collectors and child development testers, and invited to  
13  
14 111 participate in the baseline survey and medical tests. During the follow-up in  
15  
16 112 November/December 2017, we attempted to revisit the households of all formerly pregnant  
17  
18 113 women. In addition to the survey and medical measures for mothers and children, a  
19  
20 114 development test was administered to the child that resulted from the pregnancy. The household  
21  
22 115 survey, the medical measurements and the child development test were conducted within one  
23  
24 116 weeks' time for each household. **Supplementary Figure S1** visualizes the data collection  
25  
26 117 timeline, the age of the children and the gestational stage of the women during the data  
27  
28 118 collections.  
29

30

### 31 **Outcome measures**

32  
33 121 Anemia is defined over the hemoglobin level in the blood, which in our case was obtained from  
34  
35 122 a finger prick in the respondents' homes, collected by trained local enumerators. Using point-  
36  
37 123 of-care HemoCue 301® machines for capillary blood, the hemoglobin level can be determined  
38  
39 124 immediately and communicated to the tested individual or its caregivers on the spot.<sup>1</sup>[32]  
40  
41 125 According to the WHO and the Indian Council of Medical Research definitions, a pregnant  
42  
43 126 woman is anemic if her hemoglobin concentration falls below 11.0 g/dl.[33, 34] Pregnancy  
44  
45 127 anemia is further distinguished into mild anemia (10.0-10.9 g/dl), moderate anemia (7.0-9.9  
46  
47 128 g/dl) and severe anemia (<7.0 g/dl). The anemia thresholds for children between 6 and 59  
48  
49 129 months are the same as for pregnant women.[34]

50  
51 130 During data collections, the field teams followed a strict protocol upon detection of anemia. In  
52  
53 131 case of mild or moderate anemia, the women / caregivers were advised to go to the nearest  
54  
55 132 primary health care center soon to seek treatment for anemia. In case of severe anemia, the  
56  
57

---

58  
59 <sup>1</sup> The bias of HemoCue 301 anemia assessments compared to laboratory tests is with 0.25 g/dl well below  
60 the WHO recommended threshold for point-of-care machines.



1  
2  
3 133 household was alerted that immediate attention was needed. In the follow-up survey, we also  
4 134 offered to cover the treatment costs and transport to a health facility for all severely anemic  
5 135 children.  
6  
7  
8

9 136 Child development was measured with a variation of the FREDI 0-3, a German development  
10 137 test similar in structure to the Bayles Scales of Infant and Toddler Development.[35–37] Due  
11 138 to the different home environments of the children, certain items of the original FREDI 0-3  
12 139 were adjusted to the Bihari context. The development test consists of a parent questionnaire and  
13 140 a child assessment, and covers four areas: fine and gross motor development, receptive and  
14 141 expressive language development, cognition, and socio-emotional development. Two age-  
15 142 specific tests were administered, each covering skills over an age range of five months. Each  
16 143 test consisted of around 40 items. All raw scores have been standard normalized and are hence  
17 144 presented as z-scores. In addition to the four individual test scores, we calculate the total FREDI  
18 145 z-score over all 40 test items. A brief validation of the FREDI with regard to physical growth  
19 146 and maternal education is presented in **Supplemental Figure S2 and S3**.

20  
21  
22  
23  
24  
25  
26  
27  
28  
29 147 Stunting (i.e. being too short for their age), wasting (i.e. being too light for their height), and  
30 148 underweight (i.e. being too light for their age) are used as secondary health outcomes.  
31 149 Children's height and weight were measured during the field visits by the medical testing team.  
32  
33 150 We age-standardized the raw height and weight values following the WHO Growth  
34 151 Standards.[38] With a respective z-score of two standard deviations (SD) below the median of  
35 152 the WHO references population, a child is defined as being either stunted, wasted or  
36 153 underweight. Any value above six SD or below six SD was coded as measurement error and  
37 154 dropped from the analyses.<sup>2</sup> The information on diarrhea and respiratory disease incidences in  
38 155 the two weeks before the survey were collected from maternal reports during the household  
39 156 survey and coded as binary variables.  
40  
41  
42  
43  
44  
45  
46  
47

## 48 157 **Patient and public involvement**

49  
50 158 The aims and the survey design were shared at a meeting of state-and district-level government  
51 159 functionaries who provided services in Madhepura through the Women and Child Development  
52 160 ministry, village-level leaders of women's groups prior to the baseline. At this meeting, there  
53  
54  
55  
56  
57

---

58  
59 <sup>2</sup> This was the case for 21 weight-for-height z-scores, 7 weight-for-age z-scores and 11 height-for-age z-  
60 scores.

1  
2  
3 161 was a detailed discussion of the types of questions that needed to be asked during the data  
4  
5 162 collection. Several of these suggestions were incorporated in the baseline questionnaire.  
6  
7 163 Residents of Madhepura were involved to the extent that they participated in the pre-testing of  
8  
9 164 the baseline questionnaire and the FREDI tool. Patients had not been involved in the  
10  
11 165 interpretation of results, writing or editing of the final document.

### 12 13 166 **Statistical analysis**

14  
15 167 In our main analysis, we estimated the association between pregnancy anemia and the child  
16  
17 168 hemoglobin level and child development approximately two years after birth using an ordinary  
18  
19 169 least square regression model. Our secondary outcomes of interest, - being stunted, wasted, or  
20  
21 170 underweight, incidence of diarrhea and respiratory diseases in the two weeks before the survey,  
22  
23 171 were analyzed with a logistical regression model.

24  
25 172 We considered both continuous and discrete hemoglobin levels to allow for linear and non-  
26  
27 173 linear relationships between pregnancy anemia and the child outcomes. For the linear  
28  
29 174 relationship, our explanatory variable of interest was the Hb levels of the women during  
30  
31 175 pregnancy, measured at the time of the baseline data collection. For the non-linear relationship,  
32  
33 176 we used the expressions of anemia status as predictors: no pregnancy anemia mild pregnancy  
34  
35 177 anemia and moderate-to-severe pregnancy anemia. Dummy variables were created for no, mild  
36  
37 178 and moderate-to-severe anemia, and simultaneously added to the regression equation. No  
38  
39 179 anemia served as the reference category. To test a possible U-shaped relationship between  
40  
41 180 pregnancy Hb and the primary child outcomes, we include a quadratic term to the linear  
42  
43 181 regression model.

44  
45 182 All estimations controlled for the maternal Hb levels at the time of the follow-up and the  
46  
47 183 household food diversity scores. This was done to avoid an overestimation of the relationship  
48  
49 184 between pregnancy and child outcomes due to an overall poor food environment or chronic  
50  
51 185 diseases of the mothers. Overall poor household nutrition during childhood is likely to correlate  
52  
53 186 with a poor nutrition of women during pregnancy. As both factors are likely to adversely affect  
54  
55 187 child health and development, ignoring the nutritional environment at the time of the outcome  
56  
57 188 measure might lead to an overestimation of the correlation of pregnancy anemia and child  
58  
59 189 wellbeing. We therefore adjusted for maternal Hb levels the household food diversity score in  
60  
190 2017, at the time of the outcome measurement. We further add age, sex and current breast-  
191  
feeding status of the child, as well as development test facilitator (FREDI fixed effects) or

1  
2  
3 192 HemoCue machine/medical tester fixed effects as control variables to obtain more precise  
4  
5 193 estimates. Additional covariates from the baseline data relate to the socio-economic status of  
6  
7 194 the household (caste category, wealth quintile, maternal literacy) and pregnancy characteristics  
8  
9 195 which might correlated with both the Hb levels during pregnancy and child outcomes (maternal  
10  
11 196 age, pregnancy history (first birth dummy), trimester of gestation at the time of the Hb  
12  
13 197 measurement and take-up of antenatal care (ANC) services).<sup>3</sup> Lastly, we added sub-district  
14  
15 198 (block) fixed effects and clustered the standard errors on village level to take spatial correlation  
16  
17 199 of the outcome variables into account. For the sensitivity analysis, we include birth spacing,  
18  
19 200 macronutrient deficiency and postnatal depression to the estimation, and replaced block with  
20  
21 201 *panchayat* fixed effects.<sup>4</sup>

22 202 In light of strong son preferences in the study region [39, 40], we investigated heterogeneous  
23  
24 203 effects for boys and girls. Further, we tested for heterogeneous effects by ANC take-up, as a  
25  
26 204 proxy for health preferences, caste categories, maternal literacy levels and gestational trimester  
27  
28 205 at the time of the baseline survey.

29 206 As child anemia could be a result as well as a mediator for pregnancy anemia, we tested the  
30  
31 207 association between childhood Hb levels and early childhood development and infectious  
32  
33 208 diseases in separate analyses. Using the same set of covariates as described above, we  
34  
35 209 controlled for household level and child specific characteristics that might affect both child Hb  
36  
37 210 levels and the outcome variables of interest.

38  
39 211 Finally, given the existing evidence of maternal anemia for adverse pregnancy outcomes, we  
40  
41 212 conducted a survival analysis that assessed whether the Hb level of pregnant women correlates  
42  
43 213 with child loss. Such a correlation would downward biased the estimates of our main analysis,  
44  
45 214 as worst of children would systematically be missing in the group with higher exposure. We  
46  
47 215 tested this hypothesis by estimating a probit model for non-survival on the pregnancy anemia  
48  
49 216 and hemoglobin levels.

---

56  
57  
58  
59  
60  
<sup>3</sup> To test the robustness of our findings, we also conducted an analysis in which we replaced gestational trimester during pregnancy Hb measurement with the gestational months, and a subsample analysis for each of the three gestational trimesters during the pregnancy Hb measurements.

<sup>4</sup> We did not include those variables in the main specification due to missing information, which would have further reduced the sample size. A *panchayat* is a subdivision of a block and comprises several villages.

217 All estimations were weighted with inverse probability weight, as proposed by Fitzgerald,  
218 Gottschalk and Moffitt (1998) adjusting the sample for selective attrition between the  
219 waves.[41] The statistical analyses were conducted with the statistical software Stata 16  
220 (StataCorp LP).

## 221 RESULTS

### 222 Sample description

223 The final sample consisted of 941 to 1000 mother-child-dyads, depending on the outcome  
224 variable. We calculated an unadjusted minimum detectable effect of 0.22 g/dl for child Hb and  
225 0.12 SD for skill outcomes, statistically significant at the 10% level, comparing children of  
226 mothers with mild or moderate pregnancy anemia to children of mothers without pregnancy  
227 anemia. At the time of the endline data collection in 2017, the age of the children lied between  
228 22 and 32 months.

229 **Table 1** presents the explanatory variable, covariates and the outcome variables of interest of  
230 the estimation sample separately for three anemia categories: no pregnancy anemia (column 1-  
231 3), mild pregnancy anemia (column 4-6) and moderate-to-severe pregnancy anemia (column 7-  
232 9).

233 The distribution shown in the table is suggestive of a gradient in child Hb levels and growth  
234 indicators across pregnancy anemia levels. We do not observe a clear trend for the skill  
235 outcomes or disease incidences. Interestingly, the distribution of Hb levels of women after  
236 pregnancy across the anemia groups mirrors the Hb levels during pregnancy suggesting that  
237 suboptimal micronutrient intake during pregnancy continued after delivery. This is however  
238 not the case for the household food diversity scores, which is the highest for the mild pregnancy  
239 anemia group.

240

241 **Table 1 Summary statistics across exposure categories in the Hb sample**

|                                                     | No<br>preg. anemia |        |     | Mild<br>preg. anemia |        |     | Moderate or severe<br>preg. anemia |        |     |
|-----------------------------------------------------|--------------------|--------|-----|----------------------|--------|-----|------------------------------------|--------|-----|
|                                                     | Mean               | SD     | N   | Mean                 | SD     | N   | Mean                               | SD     | N   |
| <i>Outcome variables in 2017</i>                    |                    |        |     |                      |        |     |                                    |        |     |
| Hb (child)                                          | 10.97              | (1.35) | 292 | 10.71                | (1.23) | 305 | 10.26                              | (1.39) | 344 |
| Motor skills z-score                                | -0.02              | (1.04) | 284 | -0.04                | (1.00) | 298 | 0.07                               | (0.93) | 335 |
| Language skills z-score                             | 0.01               | (0.96) | 291 | -0.01                | (1.00) | 304 | 0.00                               | (1.02) | 344 |
| Cognition skills z-score                            | -0.01              | (0.99) | 290 | -0.04                | (1.02) | 304 | 0.07                               | (0.97) | 340 |
| Socio-emo. skills z-score                           | 0.01               | (0.98) | 291 | -0.02                | (1.00) | 304 | -0.02                              | (1.02) | 342 |
| Height-for-age z-score                              | -2.36              | (1.39) | 287 | -2.40                | (1.27) | 300 | -2.54                              | (1.34) | 338 |
| Weight-for-age z-score                              | -1.91              | (1.10) | 286 | -1.94                | (1.05) | 294 | -2.07                              | (1.08) | 339 |
| Weight-for-height z-score                           | -0.98              | (1.47) | 288 | -0.97                | (1.71) | 300 | -0.98                              | (1.60) | 338 |
| Respiratory disease or fever                        | 0.20               | (0.40) | 291 | 0.21                 | (0.41) | 305 | 0.20                               | (0.40) | 344 |
| Diarrhea incidence                                  | 0.24               | (0.43) | 287 | 0.25                 | (0.43) | 304 | 0.26                               | (0.44) | 344 |
| <i>Other child characteristics in 2017</i>          |                    |        |     |                      |        |     |                                    |        |     |
| Age of child (months)                               | 27.27              | (2.43) | 292 | 27.26                | (2.41) | 305 | 27.54                              | (2.16) | 344 |
| Currently breastfed                                 | 0.44               | (0.50) | 292 | 0.46                 | (0.50) | 305 | 0.44                               | (0.50) | 344 |
| Sex (Male=1)                                        | 0.53               | (0.50) | 292 | 0.50                 | (0.50) | 305 | 0.53                               | (0.50) | 344 |
| <i>Pregnancy characteristics at baseline</i>        |                    |        |     |                      |        |     |                                    |        |     |
| Hb (preg.)                                          | 11.76              | (0.72) | 292 | 10.44                | (0.29) | 305 | 8.68                               | (1.07) | 344 |
| Gestational trimester during Hb (preg.) measurement | 1.89               | (0.76) | 292 | 2.01                 | (0.69) | 305 | 2.16                               | (0.69) | 344 |
| First pregnancy                                     | 0.22               | (0.42) | 292 | 0.22                 | (0.41) | 305 | 0.19                               | (0.40) | 344 |
| Any ANC visits                                      | 0.53               | (0.50) | 292 | 0.48                 | (0.50) | 305 | 0.55                               | (0.50) | 344 |
| Supplementary iron intake during pregnancy          | 0.61               | (0.49) | 292 | 0.60                 | (0.49) | 305 | 0.57                               | (0.50) | 344 |
| Other micronutrient intake during pregnancy         | 0.43               | (0.50) | 259 | 0.40                 | (0.49) | 265 | 0.44                               | (0.50) | 306 |
| <i>Mother characteristics</i>                       |                    |        |     |                      |        |     |                                    |        |     |
| Hb (mother) in 2017                                 | 12.09              | (1.32) | 292 | 11.86                | (1.35) | 305 | 11.14                              | (1.62) | 344 |
| Mother can read at baseline                         | 0.25               | (0.43) | 292 | 0.27                 | (0.44) | 305 | 0.24                               | (0.43) | 344 |
| Age of mother (years) at baseline                   | 24.65              | (3.66) | 292 | 24.90                | (3.89) | 305 | 24.67                              | (3.93) | 344 |
| <i>Household characteristics</i>                    |                    |        |     |                      |        |     |                                    |        |     |
| Food diversity index in 2017                        | 7.01               | (1.50) | 292 | 7.30                 | (1.46) | 305 | 7.10                               | (1.52) | 344 |
| Scheduled case or tribe at baseline                 | 0.29               | (0.46) | 284 | 0.29                 | (0.46) | 295 | 0.33                               | (0.47) | 331 |
| Improved sanitation facility at baseline            | 0.14               | (0.34) | 292 | 0.12                 | (0.33) | 305 | 0.12                               | (0.32) | 344 |
| Asset index quintile at baseline                    | 3.09               | (1.44) | 292 | 3.01                 | (1.42) | 305 | 2.85                               | (1.45) | 344 |

242  
243 The majority of women in our sample (69%) were at least mildly or moderately anemic during  
244 pregnancy, with an average Hb level of 10.2 g/dl. Of all anemic women, 48% showed signs of  
245 moderate anemia, and only 4% severe anemia. Less than 2% of women had Hb level above 13  
246 g/dl, which can be considered as high. Overall, the literacy level of the study population was  
247 low with a quarter of the women being able to read and write, similar in all three presented  
248 anemia groups. Such low levels of literacy are comparable with district-wide statistics of a  
249 nationally representative survey from 2015-16.[31] Women with more severe pregnancy  
250 anemia are on average were on average in a higher gestational trimester at the time of  
251 measurement. This is unsurprising considering the elevated iron needs as pregnancy progresses.

252 Yet as gestational trimester also correlates with child age, which might affect the development  
253 test outcomes and anemia status, we will control for gestational trimester at the time of  
254 pregnancy Hb measurement in all estimations, to avoid biases. Importantly, half of the women  
255 reported not having received any ANC during pregnancy. This figure sets our sample strongly  
256 apart from most existing studies, many of which recruited their participants during ANC visits  
257 [23, 29, 42] or delivered ANC visits as part of the study [28]. The uptake of ANC services is  
258 the highest in the group of moderate or severe pregnancy anemia and lowest for women of mild  
259 pregnancy anemia.

260 The sample size during follow-up data collection reduced considerably from the baseline  
261 (N=1,918) due to the unavailability of the women or children at the time follow-up visits,  
262 inaccurate location information, refusal to provide a blood sample or to participate in the child  
263 testing, and child death (**Figure 1**). We account for this loss in sample size by using inverse  
264 probability weights in all estimations, assigning higher weights to those households that had a  
265 higher probability of dropping out.<sup>5</sup>

266 - *Figure 1 here* -

### 267 **Association of pregnancy anemia with childhood anemia and early skills**

268 We found a strong association of Hb during pregnancy, mild, and moderate or severe pregnancy  
269 anemia with the child's hemoglobin levels (**Table 2**). An increase of 1 g/dl in Hb during  
270 pregnancy was associated with 0.17 g/dl higher Hb levels in the offspring. Children born to  
271 women with mild anemia had 0.20 g/dl lower Hb level than their non-anemic peers did. The  
272 coefficient was more than twice the size for children born to mothers with moderate or severe  
273 pregnancy anemia. Current HB of the mothers are consistently positively correlated with the  
274 child Hb levels, at a statistical significance level of 1%. Testing for a U-shape relationship  
275 showed a positive, but decreasing correlation of pregnancy Hb and child Hb, statistically  
276 significant at the 5% level (*Panel C, Table 2*).

---

<sup>5</sup> Relevant weighting variables were used despite missing information, which reduces the estimation samples by two more observations.

**Table 2 Weighted regression results on the association between maternal hemoglobin (Hb) levels and anemia during pregnancy and early childhood development and childhood Hb levels**

|                              | Hb (child)                | Motor skills          | Language skills       | Cognition skills       | Socio-emo. skills     |
|------------------------------|---------------------------|-----------------------|-----------------------|------------------------|-----------------------|
| <i>Panel A</i>               |                           |                       |                       |                        |                       |
| Hb (preg.)                   | 0.17***<br>[0.11,0.23]    | -0.01<br>[-0.05,0.03] | -0.01<br>[-0.05,0.04] | -0.03*<br>[-0.07,0.00] | -0.02<br>[-0.05,0.02] |
| Hb (mother)                  | 0.13***<br>[0.07,0.20]    | 0.01<br>[-0.03,0.05]  | 0.04<br>[-0.01,0.08]  | 0.06***<br>[0.02,0.10] | 0.05**<br>[0.01,0.10] |
| R <sup>2</sup>               | 0.174                     | 0.246                 | 0.218                 | 0.303                  | 0.321                 |
| <i>Panel B</i>               |                           |                       |                       |                        |                       |
| Mild preg. anemia            | -0.20*<br>[-0.41,0.00]    | 0.03<br>[-0.13,0.19]  | 0.01<br>[-0.13,0.15]  | 0.06<br>[-0.09,0.22]   | 0.05<br>[-0.08,0.17]  |
| Moderate/severe preg. anemia | -0.57***<br>[-0.78,-0.36] | 0.06<br>[-0.10,0.22]  | 0.03<br>[-0.12,0.19]  | 0.12*<br>[-0.02,0.26]  | 0.01<br>[-0.12,0.15]  |
| Hb (mother)                  | 0.15***<br>[0.08,0.22]    | 0.01<br>[-0.03,0.05]  | 0.04*<br>[-0.01,0.08] | 0.06***<br>[0.02,0.10] | 0.05**<br>[0.00,0.09] |
| R <sup>2</sup>               | 0.172                     | 0.246                 | 0.218                 | 0.303                  | 0.321                 |
| <i>Panel C</i>               |                           |                       |                       |                        |                       |
| Hb (preg.)                   | 0.64***<br>[0.17,1.12]    | 0.16<br>[-0.12,0.45]  | 0.03<br>[-0.26,0.32]  | 0.21<br>[-0.05,0.47]   | -0.01<br>[-0.28,0.25] |
| Hb (preg.) <sup>2</sup>      | -0.02**<br>[-0.05,-0.00]  | -0.01<br>[-0.02,0.01] | -0.00<br>[-0.02,0.01] | -0.01*<br>[-0.03,0.00] | -0.00<br>[-0.01,0.01] |
| Hb (mother)                  | 0.13***<br>[0.06,0.19]    | 0.01<br>[-0.03,0.05]  | 0.04<br>[-0.01,0.08]  | 0.06***<br>[0.02,0.10] | 0.05**<br>[0.01,0.10] |
| R <sup>2</sup>               | 0.178                     | 0.247                 | 0.218                 | 0.305                  | 0.321                 |
| Controls                     | Yes                       | Yes                   | Yes                   | Yes                    | Yes                   |
| Tester fixed effects         | Yes                       | No                    | No                    | No                     | No                    |
| FREDI fixed effects          | No                        | Yes                   | Yes                   | Yes                    | Yes                   |
| N                            | 939                       | 972                   | 996                   | 990                    | 994                   |

*Notes:* Outcome variables in column (2)-(5) are standardized test scores and the coefficients are shown in standard deviations. *Panel A* uses pregnancy Hb level of the mother as main explanatory variable. In *Panel B*, the two explanatory variables of interest are mild pregnancy anemia and moderate/severe pregnancy anemia, while the omitted category is no pregnancy anemia. In *Panel C*, the level of pregnancy Hb in quadratic form is included. 95% confidence intervals using standard errors clustered on village level are in parentheses. Included control variables: caste category, wealth quintile, food diversity in 2017, breast feeding status, maternal age and literacy, first pregnancy (dummy), gestational trimester during Hb (preg.) measurement, ANC visit (dummy), child's sex and age, and block dummies. Additional control variable in in column (2)-(5): test version. Tester fixed effects are anthropometric test conductor fixed effects. FREDI fixed effects are child development test conductor fixed effects. Hemoglobin is measured in g/dl. Inverse probability weight accounting for attrition applied. Conventional significance level: \* p<0.1, \*\* p<0.05, \*\*\* p<0.01.

280 We did not find a statistically significant relationship of Hb or any type of pregnancy anemia  
281 with the child development in general, or any specific dimension of development. The  
282 coefficients were small in magnitude, indicating indeed zero-effects, rather than an imprecise  
283 estimation. For cognitive development, we found a small, negative and weakly statistically  
284 significant association with Hb level during pregnancy and moderate or severe pregnancy  
285 anemia. We found weak evidence for a U-shaped relationship between pregnancy Hb and  
286 cognitive skills, but not for motor, language or socio-emotional skills.

287 The heterogeneity analyses showed that there were only small differences in the estimates of  
288 pregnancy Hb on child Hb and skills on by gestational trimester, caste category, maternal  
289 literacy, sex and ANC take-up (**Supplemental Table S1**). In the case of language skills, we  
290 found a small, weakly statistically significant, negative interaction effect with ANC visits and  
291 a statistically significant, but positive interaction term for households belonging to a scheduled  
292 caste or tribe. Hence, for scheduled castes and tribes, we find evidence for a positive correlation  
293 of pregnancy anemia and early language skills.

294 Our findings were robust to the inclusion of additional, potentially confounding, covariates,  
295 namely birth spacing, body-mass-index and postnatal depression, panchayat fixed effects, and  
296 the exclusion of all covariates and fixed effects (**Supplemental Table S2 and S3**). Robustness  
297 checks including gestational month instead of gestational trimester, and the subgroup analysis  
298 by gestational trimester also confirmed our main results (**Supplemental Table S4 and S5**). We  
299 found no evidence for survival bias, i.e. that the surviving children were exposed to higher  
300 maternal Hb levels in-utero (**Supplemental Table S6**).

### 301 **Association of pregnancy anemia and child health indicators**

302 We found no indication that suboptimal Hb levels during pregnancy were associated with  
303 stunting, wasting or underweight of children, or increased the incidence of respiratory diseases  
304 or diarrhea (**Figure 2**).

305 - *Figure 2 here* -

306



307

308 **Association of childhood anemia with skill and child health**

309 The lack of association between pregnancy anemia, early skills and infectious diseases, despite  
 310 the strong correlation with early Hb levels, might be an indication that *childhood* anemia is not  
 311 a risk factor for early childhood development or disease incidence in our study population. The  
 312 cross-sectional analysis confirmed this hypothesis for diarrheal and respiratory diseases (**Table**  
 313 **3**). Yet, for the cumulative development scores, we found a small, but positive and statistically  
 314 significant coefficient.

315 **Table 3. Association of child's hemoglobin (Hb) with their early skills and infectious**  
 316 **disease incidence**

|                           | Cum. development z-<br>score | Respiratory disease | Diarrhea            |
|---------------------------|------------------------------|---------------------|---------------------|
|                           | Marginal effects             | Odds ratios         | Odd ratios          |
| Hb (child)                | 0.04***<br>[0.01,0.08]       | 1.02<br>[0.89,1.16] | 0.99<br>[0.88,1.11] |
| Hb (mother)               | 0.02<br>[-0.01,0.05]         | 1.00<br>[0.89,1.12] | 0.98<br>[0.88,1.08] |
| (Adjusted) R <sup>2</sup> | 0.334                        | 0.061               | 0.047               |
| Controls                  | Yes                          | Yes                 | Yes                 |
| Tester fixed effects      | Yes                          | Yes                 | Yes                 |
| FREDI fixed effects       | Yes                          | No                  | No                  |
| N                         | 915                          | 938                 | 933                 |

Notes: The outcome variable in column (1) is the standardized total test score and the coefficients are shown in standard deviations. Outcomes in column (2) and (3) are binary variables and the coefficient are shown as odds ratios. 95% Confidence intervals using standard errors clustered on village level are in parentheses. Included control variables: caste category, wealth quintile, food diversity in 2017, breast feeding, maternal age and literacy, first pregnancy (dummy), gestational trimester during Hb (preg.) measurement, ANC visit (dummy), child's sex and age, and block dummies. Additional control variable in column (1): test version. Tester fixed effects are anthropometric test conductor fixed effects. FREDI fixed effects are child development test conductor fixed effects. Hemoglobin is measured in g/dl. Inverse probability weight accounting for attrition applied. Conventional significance level: \* p<0.1, \*\* p<0.05, \*\*\* p<0.01.

317

318 **DISCUSSION**319 **Interpretation**

320 Our cohort study from rural Bihar, India, shows a strong association between maternal  
 321 hemoglobin levels during pregnancy and the hemoglobin levels of the offspring between 22  
 322 and 32 months after birth. The association is strongly statistically significant and robust to the  
 323 inclusion of several, potentially confounding, variables, such as current nutritional status of the  
 324 mother or child age. The relationship does not differ by child sex, caste category, gestational  
 325 trimester, ANC take-up or maternal literacy. Moderate and severe pregnancy anemia is

326 associated with lower Hb levels of children than mild pregnancy anemia. With increased  
327 pregnancy Hb level, the association with childhood Hb becomes weaker, yet in our sample it  
328 does not reach the tipping point to a full reversal. This might be due to the small sample size  
329 on the higher end of the Hb spectrum.

330 Our analysis extends the current literature that connects pregnancy anemia with direct birth  
331 outcomes in India, such as prematurity birth weight and size.[43, 44] The biological link  
332 between pregnancy anemia and child anemia more than two years after birth is unclear as the  
333 iron transferred from mother to child in-utero is typically consumed by the child's needs within  
334 the first year of life, before complementary feeding starts.[11] Our findings might be explained  
335 by a lower Hb trajectory since birth, initiated by the low hemoglobin environment in-utero as  
336 has been shown in Benin.[12] It is also possible that the high rate of prolonged breastfeeding  
337 (44% of the sample) hinders children with low iron stores at birth to catch up through an iron  
338 rich diet. The negative association between continued breastfeeding, anemia and iron  
339 deficiency of young children found in other studies supports this hypothesis.[4, 45]

340 Overall, our findings on childhood anemia are in line with a recent study from the US, that  
341 showed an elevated risk ratio of infant anemia from anemia during pregnancy, in particular for  
342 moderate and severe anemic condition.[15] Similarly, an analysis with data from China showed  
343 reduced Hb levels of infants for maternal anemia during the 24 - 28 gestational week, the  
344 authors find however no association for the first gestational trimester.[16] The suggestive  
345 evidence for an inverse U-shaped relationship with childhood Hb is in line with findings on  
346 preterm birth and small-for-gestational age in a review of 19 studies across the world.[10]

347 We did not find any correlation between low Hb level during pregnancy and other child health  
348 outcomes, such disease incidence or growth indicators. The disadvantage of children born to  
349 anemic mothers, compared to their peers, hence seems to be limited to the low Hb levels. Our  
350 study does also not show any association between *childhood* Hb and infectious diseases, even  
351 though iron deficiency, a major cause of anemia, is known to weaken the immune functions.[46]  
352 In this regard, our findings contradict a study on Bedouin children in Israel, presenting a strong  
353 linkage between anemia, diarrhea and respiratory illnesses of children.[47]

354 Lastly, we find no evidence that pregnancy anemia is associated with lower early childhood  
355 development, even though children's Hb levels do correlate with early skills in our sample. Our  
356 results thereby go against the outcomes of several observational studies, most prominently

1  
2  
3 357 Chang et al.'s analysis in rural China, with children as a similar age. While they did not find an  
4  
5 358 association of pregnancy anemia and psychomotor development, children of anemic mothers  
6  
7 359 showed lower scores in language and cognitive development when 18 and 24 months old.[28]  
8

9 360 Differences in the socio-economic characteristics of two study populations might explain this  
10  
11 361 difference. Not only did the mothers in Chang et al.'s study have higher levels of education, but  
12  
13 362 the prevalence of childhood undernutrition among them was about a fifth as large as in our  
14  
15 363 study population. The poor nutritional status of children in Madhepura is likely not only a result  
16  
17 364 of the insufficient intake of macro- and micronutrients but also of frequent gastrointestinal  
18  
19 365 infections. The low coverage of improved toilet facilities and high prevalence of unsafe disposal  
20  
21 366 of children's stool possibly led to greater exposure to fecal bacteria, thus facilitating the spread  
22  
23 367 of diarrheal diseases and parasites. The constant exposure to fecal bacteria could also cause  
24  
25 368 environmental enteropathy which hampers the absorption of nutrients and worsens  
26  
27 369 malnutrition.[48–50]

28 370 Furthermore, it is important to note that the human brain development is largely driven by  
29  
30 371 experience.[51] A lack of adequate learning opportunities and stimulation in the early years can  
31  
32 372 have long lasting consequences for the functioning of the brain.[52, 53] The stimulation  
33  
34 373 environment created by the caregivers for their children is limited in our study area. Only about  
35  
36 374 half of the caregivers told stories, sung songs or read a book to the children during the three  
37  
38 375 days prior to the survey. About a quarter of the mothers reported that no household member  
39  
40 376 had played with the child in that time.

41 377 Taken together, all of these lead us to argue that the additional, possible adverse impact of  
42  
43 378 pregnancy anemia on child development in our study setting was not large enough to be  
44  
45 379 detectable in our estimations.

## 46 380 **Limitations**

47  
48  
49 381 Our analysis is based on the assumption that the single hemoglobin measure taken at baseline  
50  
51 382 is informative of the hemoglobin status during the full course of pregnancy. Most Hb  
52  
53 383 measurements of our participants were taken in the second trimester, allowing sufficient time  
54  
55 384 for any improvement in the Hb levels during the remaining months. Such improvements after  
56  
57 385 the baseline data collection would hence weaken the relationship of Hb that we measured with  
58  
59 386 child outcomes. Given that half of the mothers in our sample reported not having consumed  
60

387 any iron supplements during pregnancy or received any antenatal care, we believe that the  
388 extent of such attenuation bias is limited.

389 The loss of follow-up of around half of the study children is reason for concern about the  
390 external validity of our findings. Despite weighting the study sample according to their inverse  
391 probably of attrition, we are only able to correct for observable differences in the study  
392 population and the lost observations. If the unobserved characteristics which caused the loss in  
393 follow-up also correlated with the explanatory and outcome variables, the results of our analysis  
394 would be biased.

395 Any systematic error in Hb measurement, depending on the Hb level, could be a bigger concern.  
396 This could have been induced by the differential recommendations our field team gave based  
397 on the blood test results. However, our data do not support this hypothesis. We did not observe  
398 a particular behavior change in more severely anemic women: even after delivery only 57% of  
399 the women with moderate or severe pregnancy anemia reported consuming iron supplements  
400 during pregnancy, compared to 60-61% in the mildly and non-anemic group. During  
401 pregnancy, the reported supplementation rates across the groups were as well similar (16% of  
402 the moderately or severely anemic women vs. 19-20% of the mildly or non-anemic women).  
403 This suggests that our advice did not alter the women's behavior. Two additional points should  
404 be kept in mind when interpreting our findings. First, we collected Hb levels but not ferritin  
405 levels, which leaves room for speculation on the origin of anemia in the study sample. Although  
406 iron deficiency is commonly believed to be the major reason for anemia, to our knowledge, no  
407 study has documented the actual share of iron deficiency anemia among the anemic pregnant  
408 women in rural Bihar. Second, it should be noted that the share of severely anemic pregnant  
409 women in our study is very small. Our estimated association of moderate or severe anemia and  
410 child development and Hb is hence mainly attributable to the group of women who were  
411 moderately anemic during pregnancy.

## 412 **Conclusion**

413 We find strong, yet not causal, evidence that pregnancy anemia is a risk factor for childhood  
414 anemia but not for any deficiency in the development of early skills, on average. The  
415 relationship between pregnancy anemia and childhood Hb grows stronger with lower levels of  
416 Hb during pregnancy. Yet, diarrhea or respiratory disease incidence or child growth is not  
417 affected by either childhood Hb or pregnancy Hb. This study gives important insights into the

1  
2  
3 418 consequences of pregnancy anemia for populations underserved by antenatal care services and  
4  
5 419 with high rates of malnutrition. Nevertheless, using a singular Hb measurement during  
6  
7 420 pregnancy and facing high rate of attrition between the waves might affect the external validity  
8  
9 421 of our results. Nevertheless, the strong association between pregnancy anemia and childhood  
10  
11 422 anemia we identified in this study should be further investigated to observe if it will affect later  
12  
13 423 life outcomes, commonly associated with iron deficiency and anemia.

14  
15 424  
16  
17  
18  
19  
20  
21  
22  
23  
24  
25  
26  
27  
28  
29  
30  
31  
32  
33  
34  
35  
36  
37  
38  
39  
40  
41  
42  
43  
44  
45  
46  
47  
48  
49  
50  
51  
52  
53  
54  
55  
56  
57  
58  
59  
60

For peer review only

1  
2  
3 425  
4  
5

6 426 **Author contribution:** EH, MAS and SV designed research and the survey instruments, CM  
7 427 designed the child skill assessment. SV and MAS coordinated the first wave data collection,  
8 428 EH coordinated and supervised the second wave data collection, with the support by CM for  
9 429 the child testing. EH analyzed the data, wrote the paper, had primary responsibility for final  
10 430 content. All authors have read and approved the final manuscript.

11 431 **Acknowledgement:** The authors acknowledge the immensely helpful contribution during the  
12 432 data collections and advice of Cara Ebert, Abhijeet Kumar, and Mareike Schön.

13 433 **Funding:** This work was supported by the German Research Foundation (DFG) (Research  
14 434 Training Group 1723) and 3ie International Initiative for Impact Evaluation (CPW.01.GV.IE).  
15 435 The study was prepared in parts during the PhD Fellowship at the United Nations University  
16 436 World Institute for Development Economic Research (UNUWIDER)

17 437 **Competing interests:** None declared.

18 438 **Patient consent for publication:** Not required.

19 439 **Ethics approval:** The study was approved by the ethics board of the IIT Gandhinagar  
20 440 (IEC/2014-15/2/MS/006, IEC/2016-17/2/MS/025) and the University of Goettingen (no IRB  
21 441 number available). We obtained written informed consent for the interviews, growth  
22 442 measurements, blood sample collections and the child development testing during each wave.

23 443 **Data availability statement:** No additional data available.

24  
25  
26  
27  
28  
29  
30  
31  
32  
33  
34  
35  
36  
37  
38  
39  
40  
41  
42  
43  
44  
45  
46  
47  
48  
49  
50  
51  
52  
53  
54  
55  
56  
57  
58  
59  
60

## REFERENCES

1. Morgane PJ, Austin-LaFrance R, Bronzino J, Tonkiss J, Díaz-Cintra S, Cintra L, et al. Prenatal malnutrition and development of the brain. *Neuroscience & Biobehavioral Reviews*. 1993;17:91–128.
2. Stevens GA, Finucane MM, De-Regil LM, Paciorek CJ, Flaxman SR, Branca F, et al. Global, regional, and national trends in haemoglobin concentration and prevalence of total and severe anaemia in children and pregnant and non-pregnant women for 1995–2011: a systematic analysis of population-representative data. *The Lancet Global Health*. 2013;1:e16–25.
3. Balarajan Y, Ramakrishnan U, Özaltin E, Shankar AH, Subramanian S. Anaemia in low-income and middle-income countries. *The Lancet*. 2011;378:2123–35.
4. Pasricha S-R, Black J, Muthayya S, Shet A, Bhat V, Nagaraj S, et al. Determinants of Anemia Among Young Children in Rural India. *PEDIATRICS*. 2010;126:e140–9.
5. Allen LH. Biological Mechanisms That Might Underlie Iron's Effects on Fetal Growth and Preterm Birth. *The Journal of Nutrition*. 2001;131:581S-589S.
6. Burke R, Leon J, Suchdev P. Identification, Prevention and Treatment of Iron Deficiency during the First 1000 Days. *Nutrients*. 2014;6:4093–114.
7. de Pee S, Bloem MW, Sari M, Kiess L, Yip R, Kosen S. The High Prevalence of Low Hemoglobin Concentration among Indonesian Infants Aged 3–5 Months Is Related to Maternal Anemia. *The Journal of Nutrition*. 2002;132:2215–21.
8. Shao J, Lou J, Rao R, Georgieff MK, Kaciroti N, Felt BT, et al. Maternal Serum Ferritin Concentration Is Positively Associated with Newborn Iron Stores in Women with Low Ferritin Status in Late Pregnancy. *The Journal of Nutrition*. 2012;142:2004–9.
9. Rahman MM, Abe SK, Rahman MS, Kanda M, Narita S, Bilano V, et al. Maternal anemia and risk of adverse birth and health outcomes in low- and middle-income countries: systematic review and meta-analysis. *Am J Clin Nutr*. 2016;103:495–504.
10. Dewey KG, Oaks BM. U-shaped curve for risk associated with maternal hemoglobin, iron status, or iron supplementation. *Am J Clin Nutr*. 2017;106 Supplement 6:1694S-1702S.
11. Chaparro CM. Setting the Stage for Child Health and Development: Prevention of Iron Deficiency in Early Infancy. *The Journal of Nutrition*. 2008;138:2529–33.
12. Koura KG, Ouédraogo S, Cottrell G, Le Port A, Massougbedji A, Garcia A. Maternal Anaemia at Delivery and Haemoglobin Evolution in Children during Their First 18 Months of Life Using Latent Class Analysis. *PLoS ONE*. 2012;7:e50136.
13. Abioye AI, McDonald EA, Park S, Ripp K, Bennett B, Wu HW, et al. Maternal anemia type during pregnancy is associated with anemia risk among offspring during infancy. *Pediatr Res*. 2019;86:396–402.
14. Kumar A, Rai AK, Basu S, Dash D, Singh JS. Cord blood and breast milk iron status in maternal anemia. *Pediatrics*. 2008;121:e673-677.
15. Leslie MS, Park J, Briggs LA, El-Banna MM, Greene J. Is Anemia in Low Income Pregnant Women Related to Their Infants' Having Anemia? A Cohort Study of Pregnant Women-Infant Pairs in the United States. *Matern Child Health J*. 2020;24:768–76.

16. Zhang Y, Jin L, Liu J, Ye R, Ren A. Maternal Hemoglobin Concentration during Gestation and Risk of Anemia in Infancy: Secondary Analysis of a Randomized Controlled Trial. *The Journal of Pediatrics*. 2016;175:106-110.e2.
17. Georgieff MK. Iron deficiency in pregnancy. *American Journal of Obstetrics and Gynecology*. 2020;223:516–24.
18. Stevens GA, Finucane MM, De-Regil LM, Paciorek CJ, Flaxman SR, Branca F, et al. Global, regional, and national trends in haemoglobin concentration and prevalence of total and severe anaemia in children and pregnant and non-pregnant women for 1995–2011: a systematic analysis of population-representative data. *The Lancet Global Health*. 2013;1:e16–25.
19. Lozoff B. Iron Deficiency and Child Development. *Food and Nutrition Bulletin*. 2007;28 4\_suppl4:S560–71.
20. Lukowski AF, Koss M, Burden MJ, Jonides J, Nelson CA, Kaciroti N, et al. Iron deficiency in infancy and neurocognitive functioning at 19 years: evidence of long-term deficits in executive function and recognition memory. *Nutritional Neuroscience*. 2010;13:54–70.
21. Janbek J, Sarki M, Specht IO, Heitmann BL. A systematic literature review of the relation between iron status/anemia in pregnancy and offspring neurodevelopment. *Eur J Clin Nutr*. 2019;73:1561–78.
22. McCann S, Perapoch Amadó M, Moore SE. The Role of Iron in Brain Development: A Systematic Review. *Nutrients*. 2020;12:2001.
23. Angulo-Barroso RM, Li M, Santos DCC, Bian Y, Sturza J, Jiang Y, et al. Iron Supplementation in Pregnancy or Infancy and Motor Development: A Randomized Controlled Trial. *PEDIATRICS*. 2016;137:e20153547–e20153547.
24. Santos DCC, Angulo-Barroso RM, Li M, Bian Y, Sturza J, Richards B, et al. Timing, duration, and severity of iron deficiency in early development and motor outcomes at 9 months. *European Journal of Clinical Nutrition*. 2018;72:332–41.
25. Tran TD, Tran T, Simpson JA, Tran HT, Nguyen TT, Hanieh S, et al. Infant motor development in rural Vietnam and intrauterine exposures to anaemia, iron deficiency and common mental disorders: a prospective community-based study. *BMC Pregnancy and Childbirth*. 2014;14. doi:10.1186/1471-2393-14-8.
26. Hanieh S, Ha TT, Simpson JA, Braat S, Thuy TT, Tran TD, et al. Effect of low-dose versus higher-dose antenatal iron supplementation on child health outcomes at 36 months of age in Viet Nam: longitudinal follow-up of a cluster randomised controlled trial. *BMJ Global Health*. 2017;2:e000368.
27. Tran TD, Biggs B-A, Tran T, Simpson JA, Hanieh S, Dwyer T, et al. Impact on Infants' Cognitive Development of Antenatal Exposure to Iron Deficiency Disorder and Common Mental Disorders. *PLoS ONE*. 2013;8:e74876.
28. Chang S, Zeng L, Brouwer ID, Kok FJ, Yan H. Effect of Iron Deficiency Anemia in Pregnancy on Child Mental Development in Rural China. *PEDIATRICS*. 2013;131:e755–63.
29. Parsons AG, Zhou SJ, Spurrier NJ, Makrides M. Effect of iron supplementation during pregnancy on the behaviour of children at early school age: long-term follow-up of a randomised controlled trial. *British Journal of Nutrition*. 2008;99. doi:10.1017/S0007114507853359.
30. Zhou SJ, Gibson RA, Crowther CA, Baghurst P, Makrides M. Effect of iron supplementation during pregnancy on the intelligence quotient and behavior of children at 4 y of age: long-term follow-up of a randomized controlled trial. *The American Journal of Clinical Nutrition*. 2006;83:1112–7.



- 1  
2  
3 31. IIPS. National Family Health Survey 2015-16 District Fact Sheet Madhepura Bihar. 2017.  
4 [http://rchiips.org/NFHS/FCTS/BR/BR\\_FactSheet\\_213\\_Madhepura.pdf](http://rchiips.org/NFHS/FCTS/BR/BR_FactSheet_213_Madhepura.pdf).
- 5  
6 32. Yadav K, Kant S, Ramaswamy G, Ahamed F, Jacob OM, Vyas H, et al. Validation of Point of Care  
7 Hemoglobin Estimation Among Pregnant Women Using Digital Hemoglobinometers (HemoCue 301  
8 and HemoCue 201+) as Compared with Auto-Analyzer. *Indian J Hematol Blood Transfus.*  
9 2020;36:342–8.
- 10  
11 33. Sharma JB, Shankar M. Anemia in Pregnancy. *JIMSA.* 2010;23:253–60.
- 12  
13 34. World Health Organization. Haemoglobin concentrations for the diagnosis of anaemia and  
14 assessment of severity. Geneva: World Health Organization; 2011.  
15 <http://www.who.int/vmnis/indicators/haemoglobin.pdf>.
- 16  
17 35. Albers CA, Grieve AJ. Test Review: Bayley, N. (2006). Bayley Scales of Infant and Toddler  
18 Development– Third Edition. San Antonio, TX: Harcourt Assessment. *Journal of Psychoeducational*  
19 *Assessment.* 2007;25:180–90.
- 20  
21 36. Mähler C, Cartschau F, Rohleder K. Frühkindliche Entwicklungsdiagnostik für Kinder von 0-3  
22 Jahren (FREDI 0-3). Goettingen: Hogrefe; 2016.
- 23  
24 37. Hasselhorn M. Fredi 0–3. *Frühe Bildung.* 2017;6:101–3.
- 25  
26 38. World Health Organization, UNICEF. WHO child growth standards and the identification of severe  
27 acute malnutrition in infants and children: a joint statement by the World Health Organization and the  
28 United Nations Children’s Fund. 2009. <http://www.ncbi.nlm.nih.gov/books/NBK200775/>. Accessed 26  
29 Sep 2020.
- 30  
31 39. Barcellos SH, Carvalho LS, Lleras-Muney A. Child Gender and Parental Investments In India: Are  
32 Boys and Girls Treated Differently? *American Economic Journal: Applied Economics.* 2014;6:157–89.
- 33  
34 40. Ebert C, Vollmer S. Child-specific son preference, birth order and cognitive skills in early childhood.  
35 Courant Research Centre “Poverty, Equity and Growth.” 2019; #264.
- 36  
37 41. Fitzgerald J, Gottschalk P, Moffitt R. An Analysis of Sample Attrition in Panel Data: The Michigan  
38 Panel Study of Income Dynamics. Working Paper. National Bureau of Economic Research; 1998.  
39 doi:10.3386/t0220.
- 40  
41 42. Mireku MO, Davidson LL, Koura GK, Ouédraogo S, Boivin MJ, Xiong X, et al. Prenatal  
42 Hemoglobin Levels and Early Cognitive and Motor Functions of One-Year-Old Children.  
43 *PEDIATRICS.* 2015;136:10.
- 44  
45 43. Nair M, Choudhury MK, Choudhury SS, Kakoty SD, Sarma UC, Webster P, et al. Association  
46 between maternal anaemia and pregnancy outcomes: a cohort study in Assam, India. *BMJ Global*  
47 *Health.* 2016;1:e000026.
- 48  
49 44. Patel A, Prakash AA, Das PK, Gupta S, Pusdekar YV, Hibberd PL. Maternal anemia and  
50 underweight as determinants of pregnancy outcomes: cohort study in eastern rural Maharashtra, India.  
51 *BMJ Open.* 2018;8:e021623.
- 52  
53 45. Maguire JL, Salehi L, Birken CS, Carsley S, Mamdani M, Thorpe KE, et al. Association Between  
54 Total Duration of Breastfeeding and Iron Deficiency. *PEDIATRICS.* 2013;131:e1530–7.
- 55  
56 46. Ekiz C, Agaoglu L, Karakas Z, Gurel N, Yalcin I. The effect of iron deficiency anemia on the  
57 function of the immune system. *Hematol J.* 2005;;579–83.
- 58  
59  
60

- 1  
2  
3 47. Levy A, Fraser D, Rosen SD, Dagan R, Deckelbaum RJ, Coles C, et al. Anemia as a risk factor for  
4 infectious diseases in infants and toddlers: Results from a prospective study. *Eur J Epidemiol.*  
5 2005;20:277–84.  
6  
7 48. Kosek MN, Ahmed T, Bhutta Z, Caulfield L, Guerrant R, Houpt E, et al. Causal Pathways from  
8 Enteropathogens to Environmental Enteropathy: Findings from the MAL-ED Birth Cohort Study.  
9 *EBioMedicine.* 2017;18:109–17.  
10  
11 49. Ngure FM, Reid BM, Humphrey JH, Mbuya MN, Pelto G, Stoltzfus RJ. Water, sanitation, and  
12 hygiene (WASH), environmental enteropathy, nutrition, and early child development: making the links:  
13 WASH and ECD: making the links. *Annals of the New York Academy of Sciences.* 2014;1308:118–  
14 28.  
15  
16 50. Watanabe K, Petri WA. Environmental Enteropathy: Elusive but Significant Subclinical  
17 Abnormalities in Developing Countries. *EBioMedicine.* 2016;10:25–32.  
18  
19 51. Knudsen EI. Sensitive Periods in the Development of the Brain and Behavior. *Journal of Cognitive*  
20 *Neuroscience.* 2004;16:1412–25.  
21  
22 52. Prado EL, Dewey KG. Nutrition and brain development in early life. *Nutrition Reviews.*  
23 2014;72:267–84.  
24  
25 53. Walker SP, Wachs TD, Grantham-McGregor S, Black MM, Nelson CA, Huffman SL, et al.  
26 Inequality in early childhood: risk and protective factors for early child development. *The Lancet.*  
27 2011;378:1325–38.  
28  
29  
30  
31  
32  
33  
34  
35  
36  
37  
38  
39  
40  
41  
42  
43  
44  
45  
46  
47  
48  
49  
50  
51  
52  
53  
54  
55  
56  
57  
58  
59  
60

**Figures**

Figure 1 Attrition between 2015 (wave 1) and 2017 (wave 2) in childhood hemoglobin and skills sample

Figure 2 Weighted regression results on the association between maternal hemoglobin (Hb) levels during pregnancy and growth and disease incidence indicators (odds ratios)

For peer review only



Figure 1  
Attrition between 2015 (wave 1) and 2017 (wave 2) in childhood hemoglobin and skills sample

338x190mm (96 x 96 DPI)

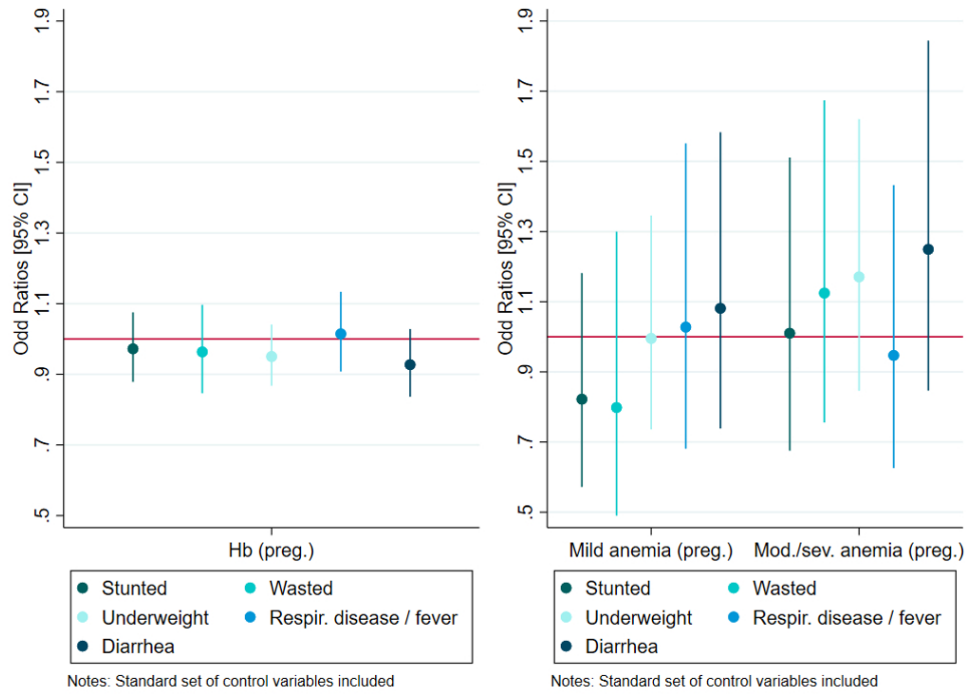

Figure 2

Weighted regression results on the association between maternal hemoglobin (Hb) levels during pregnancy and growth and disease incidence indicators (odds ratios)

207x151mm (129 x 129 DPI)

**Online Supporting Material**

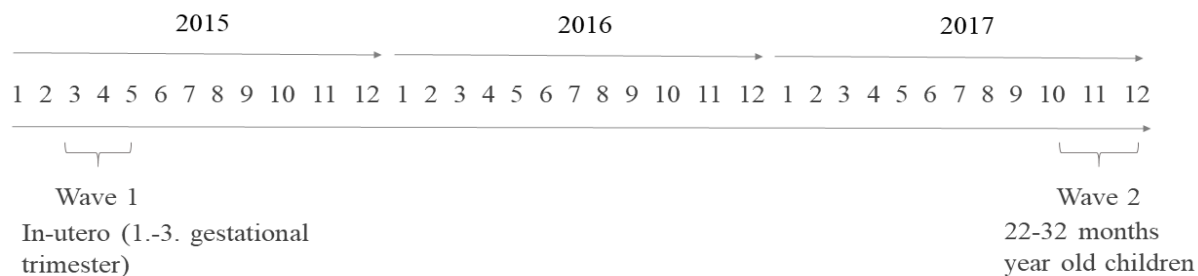

**Supplemental Figure S1 Timeline of data collections and the respective age of the children**

Review only

1  
2  
3  
4  
5  
6  
7  
8  
9  
10  
11  
12  
13  
14  
15  
16  
17  
18  
19  
20  
21  
22  
23  
24  
25  
26  
27  
28  
29  
30  
31  
32  
33  
34  
35  
36  
37  
38  
39  
40  
41  
42  
43  
44  
45  
46  
47  
48  
49  
50  
51  
52  
53  
54  
55  
56  
57  
58  
59  
60



**Supplemental Figure S2 Average cumulative development test scores by maternal education category**

For peer review only

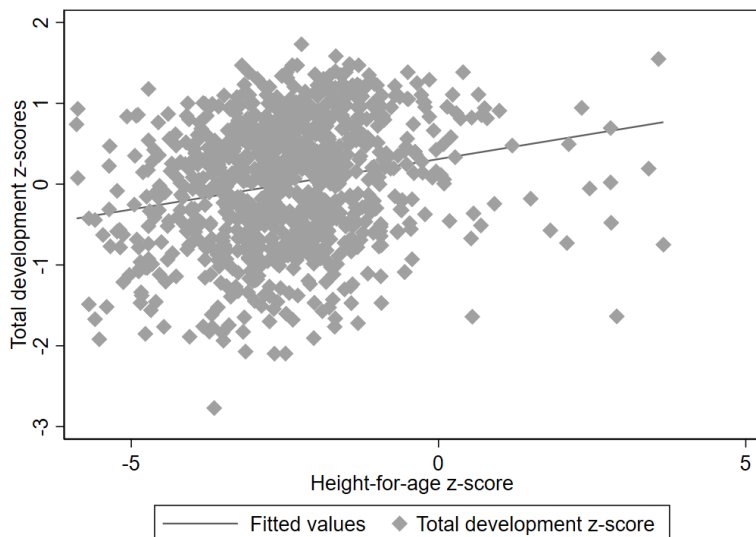

**Supplemental Figure S3 Average cumulative development test scores by of FREDI by child growth**

Peer review only



### Supplemental Table S1 Heterogeneous treatment effects using a linear regression model on child hemoglobin levels and skills dimensions

|                                           | Hb (child)          | Motor skills      | Language skills    | Cognition skills   | Socio-emo. skill   |
|-------------------------------------------|---------------------|-------------------|--------------------|--------------------|--------------------|
| <b>Panel A: By antenatal care uptake</b>  |                     |                   |                    |                    |                    |
| Hb (preg.)                                | 0.162***<br>(0.042) | -0.006<br>(0.029) | 0.034<br>(0.030)   | -0.029<br>(0.025)  | 0.013<br>(0.025)   |
| Any ANC # Hb (preg.)                      | 0.014<br>(0.058)    | -0.006<br>(0.035) | -0.079*<br>(0.041) | -0.007<br>(0.034)  | -0.059*<br>(0.035) |
| R <sup>2</sup>                            | 0.174               | 0.248             | 0.221              | 0.304              | 0.332              |
| N                                         | 938                 | 972               | 996                | 990                | 994                |
| <b>Panel B: By child's sex</b>            |                     |                   |                    |                    |                    |
| Hb (preg.)                                | 0.208***<br>(0.041) | 0.009<br>(0.028)  | -0.018<br>(0.025)  | -0.027<br>(0.027)  | -0.025<br>(0.024)  |
| Male # Hb (preg.)                         | -0.077<br>(0.064)   | -0.037<br>(0.037) | 0.024<br>(0.038)   | -0.009<br>(0.034)  | 0.015<br>(0.036)   |
| R <sup>2</sup>                            | 0.176               | 0.247             | 0.218              | 0.303              | 0.321              |
| N                                         | 939                 | 972               | 996                | 990                | 994                |
| <b>Panel C: By caste category</b>         |                     |                   |                    |                    |                    |
| Hb (preg.)                                | 0.164***<br>(0.033) | -0.016<br>(0.023) | -0.030<br>(0.026)  | -0.035*<br>(0.019) | -0.019<br>(0.022)  |
| Scheduled caste or tribe # Hb (preg.)     | 0.033<br>(0.079)    | 0.032<br>(0.039)  | 0.088**<br>(0.044) | 0.005<br>(0.041)   | -0.008<br>(0.039)  |
| R <sup>2</sup>                            | 0.177               | 0.245             | 0.220              | 0.306              | 0.318              |
| N                                         | 908                 | 941               | 964                | 958                | 962                |
| <b>Panel D: By maternal literacy</b>      |                     |                   |                    |                    |                    |
| Hb (preg.)                                | 0.166***<br>(0.035) | -0.011<br>(0.022) | -0.007<br>(0.023)  | -0.021<br>(0.020)  | -0.015<br>(0.021)  |
| Maternal literacy # Hb (preg.)            | 0.014<br>(0.072)    | 0.010<br>(0.050)  | 0.003<br>(0.047)   | -0.047<br>(0.047)  | -0.013<br>(0.038)  |
| R <sup>2</sup>                            | 0.174               | 0.246             | 0.218              | 0.304              | 0.321              |
| N                                         | 939                 | 972               | 996                | 990                | 994                |
| <b>Panel E: By gestational trimester</b>  |                     |                   |                    |                    |                    |
| Hb (preg.)                                | 0.173***<br>(0.054) | -0.029<br>(0.038) | -0.029<br>(0.040)  | -0.051<br>(0.037)  | -0.026<br>(0.034)  |
| Second gestational trimester # Hb (preg.) | -0.031<br>(0.077)   | 0.039<br>(0.045)  | 0.061<br>(0.047)   | 0.029<br>(0.044)   | 0.041<br>(0.046)   |
| Third gestational trimester # Hb (preg.)  | 0.027<br>(0.073)    | 0.011<br>(0.052)  | -0.010<br>(0.053)  | 0.020<br>(0.050)   | -0.031<br>(0.040)  |
| R <sup>2</sup>                            | 0.175               | 0.246             | 0.220              | 0.303              | 0.323              |
| N                                         | 939                 | 972               | 996                | 990                | 994                |
| Controls                                  | Yes                 | Yes               | Yes                | Yes                | Yes                |
| Tester fixed effects                      | Yes                 | No                | No                 | No                 | No                 |
| FREDI fixed effects                       | No                  | Yes               | Yes                | Yes                | Yes                |

Notes: Outcome variables in column (2)-(5) are standardized test scores and the coefficients are shown in standard deviations. Standard errors clustered on village level are in parentheses. Included control variables: caste category, wealth quintile, food diversity in 2017, breast feeding, maternal age and literacy, first pregnancy (dummy), gestational trimester during Hb (preg.) measurement, ANC visit (dummy), child's sex and age, and block dummies. Additional control variable in column (2)-(5): test version. Tester fixed effects are anthropometric test conductor fixed effects. FREDI fixed effects are child development test conductor fixed effects. Hemoglobin is measured in g/dl. Inverse probability weight accounting for attrition applied. Conventional significance level: \* p<0.1, \*\* p<0.05, \*\*\* p<0.01.

**Supplemental Table S2 Linear regression model results of haemoglobin level of children on haemoglobin levels during pregnancy with additional covariates**

|                                   | Hb (child)          |
|-----------------------------------|---------------------|---------------------|---------------------|---------------------|---------------------|
| Hb (preg.)                        | 0.176***<br>(0.029) | 0.163***<br>(0.030) | 0.165***<br>(0.029) | 0.154***<br>(0.030) | 0.213***<br>(0.033) |
| Hb (mother)                       | 0.127***<br>(0.034) | 0.133***<br>(0.034) | 0.128***<br>(0.036) | 0.134***<br>(0.035) |                     |
| Mother gave birth in past 2 years | 0.013<br>(0.111)    |                     |                     |                     |                     |
| BMI (preg.)                       |                     | 0.009<br>(0.016)    |                     |                     |                     |
| Postnatal depression              |                     |                     | 0.087<br>(0.118)    |                     |                     |
| Controls                          | Yes                 | Yes                 | Yes                 | Yes                 | No                  |
| Tester fixed effects              | Yes                 | Yes                 | Yes                 | Yes                 | No                  |
| Panchayat dummies                 | No                  | No                  | No                  | Yes                 | No                  |
| Block dummies                     | Yes                 | Yes                 | Yes                 | No                  | No                  |
| N                                 | 896                 | 933                 | 807                 | 939                 | 939                 |
| R <sup>2</sup>                    | 0.173               | 0.174               | 0.161               | 0.236               | 0.054               |

Notes: Each column presents the estimation results of the main estimation with the displayed covariates or spatial fixed effects. Standard errors clustered on village level are in parentheses. Control variables: caste category, wealth quintile, food diversity in 2017, breast feeding, maternal age and literacy, first pregnancy (dummy), gestational trimester during Hb (preg.) measurement, ANC visit (dummy), child's sex and age.. Hemoglobin is measured in g/dl. Inverse probability weight accounting for attrition applied. Conventional significance level: \* p<0.1, \*\* p<0.05, \*\*\* p<0.01.

**Supplemental Table S3 Linear regression model results of cumulative test scores of children on haemoglobin levels during pregnancy with additional covariates**

|                                      | Cum.<br>development<br>score | Cum.<br>development<br>score | Cum.<br>development<br>score | Cum.<br>development<br>score | Cum.<br>development<br>score |
|--------------------------------------|------------------------------|------------------------------|------------------------------|------------------------------|------------------------------|
| Hb (preg.)                           | -0.023<br>(0.015)            | -0.015<br>(0.014)            | -0.009<br>(0.016)            | -0.015<br>(0.016)            | -0.008<br>(0.017)            |
| Hb (mother)                          | 0.042***<br>(0.016)          | 0.041**<br>(0.016)           | 0.036**<br>(0.017)           | 0.042**<br>(0.017)           |                              |
| Mother gave birth in past 2<br>years | -0.017<br>(0.050)            |                              |                              |                              |                              |
| BMI (preg.)                          |                              | 0.004<br>(0.008)             |                              |                              |                              |
| Postnatal depression                 |                              |                              | 0.045<br>(0.051)             |                              |                              |
| Controls                             | Yes                          | Yes                          | Yes                          | Yes                          | No                           |
| FREDI fixed effects                  | Yes                          | Yes                          | Yes                          | Yes                          | No                           |
| Panchayat dummies                    | No                           | No                           | No                           | Yes                          | No                           |
| Block dummies                        | Yes                          | Yes                          | Yes                          | No                           | No                           |
| N                                    | 926                          | 966                          | 836                          | 972                          | 972                          |
| R <sup>2</sup>                       | 0.335                        | 0.325                        | 0.325                        | 0.375                        | 0.000                        |

Notes: Each column presents the estimation results of the main estimation with the displayed covariates or spatial fixed effects. Standard errors clustered on village level are in parentheses. Control variables: caste category, wealth quintile, food diversity in 2017, breast feeding, maternal age and literacy, first pregnancy (dummy), gestational trimester during Hb (preg.) measurement, ANC visit (dummy), test version, child's sex and age. Hemoglobin is measured in g/dl. Inverse probability weight accounting for attrition applied. Conventional significance level: \* p<0.1, \*\* p<0.05, \*\*\* p<0.01.

**Supplemental Table S4 Linear regression model results of childhood Hb levels on Hb levels during pregnancy controlling for gestational month during Hb measurements and gestational trimester specific subgroup analyses**

|                                           | Hb (child)        | Hb (child)                | Hb (child)                 | Hb (child)                |
|-------------------------------------------|-------------------|---------------------------|----------------------------|---------------------------|
| Hb (preg.)                                | 0.17***<br>(0.03) | 0.13**<br>(0.06)          | 0.15***<br>(0.05)          | 0.20***<br>(0.05)         |
| Hb (mother)                               | 0.13***<br>(0.03) | 0.16**<br>(0.06)          | 0.13**<br>(0.06)           | 0.08<br>(0.06)            |
| Gestational month during preg. Hb measure | 0.01<br>(0.02)    |                           |                            |                           |
| Controls                                  | Yes               | Yes                       | Yes                        | Yes                       |
| Tester fixed effects                      | Yes               | Yes                       | Yes                        | Yes                       |
| Sample                                    | Full sample       | First trimester subsample | Second trimester subsample | Third trimester subsample |
| N                                         | 972               | 245                       | 467                        | 260                       |
| R <sup>2</sup>                            | 0.324             | 0.376                     | 0.416                      | 0.364                     |

Notes: In column (1) the dummies for the gestational trimester during pregnancy Hb measurement are replaced by the gestational month. Column (2)-(4) present the sub-group analyses for each gestational trimester. Standard errors clustered on village level are in parentheses. Control variables: caste category, wealth quintile, food diversity in 2017, breast feeding, maternal age and literacy, first pregnancy (dummy), ANC visit (dummy), child's sex and age and block dummies. Hemoglobin is measured in g/dl. Inverse probability weight accounting for attrition applied. Conventional significance level: \* p<0.1, \*\* p<0.05, \*\*\* p<0.01.

**Supplemental Table S5 Linear regression model results of cumulative test scores of children on Hb levels during pregnancy controlling for gestational month during Hb measurements and gestational trimester specific subgroup analyses**

|                                           | Cum. development score | Cum. development score    | Cum. development score     | Cum. development score    |
|-------------------------------------------|------------------------|---------------------------|----------------------------|---------------------------|
| Hb (preg.)                                | -0.01<br>(0.01)        | 0.00<br>(0.03)            | 0.01<br>(0.02)             | -0.06*<br>(0.03)          |
| Hb (mother)                               | 0.04**<br>(0.02)       | -0.04<br>(0.04)           | 0.04*<br>(0.02)            | 0.07**<br>(0.03)          |
| Gestational month during preg. Hb measure | 0.03**<br>(0.01)       |                           |                            |                           |
| Controls                                  | Yes                    | Yes                       | Yes                        | Yes                       |
| FREDI fixed effects                       | Yes                    | Yes                       | Yes                        | Yes                       |
| Sample                                    | Full sample            | First trimester subsample | Second trimester subsample | Third trimester subsample |
| N                                         | 972                    | 245                       | 467                        | 260                       |
| R <sup>2</sup>                            | 0.324                  | 0.376                     | 0.416                      | 0.364                     |

Notes: In column (1) the dummies for the gestational trimester during pregnancy Hb measurement are replaced by the gestational month. Column (2)-(4) present the sub-group analyses for each gestational trimester. Standard errors clustered on village level are in parentheses. Control variables: caste category, wealth quintile, food diversity in 2017, breast feeding, maternal age and literacy, first pregnancy (dummy), ANC visit (dummy), test version, child's sex and age. Hemoglobin is measured in g/dl. Inverse probability weight accounting for attrition applied. Conventional significance level: \* p<0.1, \*\* p<0.05, \*\*\* p<0.01.

**Supplemental Table S6 Logit estimation results of child survival until wave 2 on Hb levels and anemia status during pregnancy**

|                                | Not alive        | Not alive        | Not alive        | Not alive        |
|--------------------------------|------------------|------------------|------------------|------------------|
| Hb (preg.)                     | 1.017<br>(0.047) | 0.991<br>(0.052) |                  |                  |
| Mild anemia (preg.)            |                  |                  | 0.995<br>(0.183) | 1.012<br>(0.205) |
| Moderate/severe anemia (preg.) |                  |                  | 1.080<br>(0.195) | 1.170<br>(0.230) |
| Controls                       | No               | Yes              | No               | Yes              |
| N                              | 1821             | 1622             | 1821             | 1622             |

*Notes:* Standard errors clustered in village level are in in parentheses. The binary outcome variable equals 1 if a child had not survived from pregnancy to wave 2. The coefficients are reported in odds ratios. Column (1) and (2) uses pregnancy Hb level of the mother as main explanatory variable. In Column (3) and (4), the two explanatory variables of interest are mild pregnancy anemia and moderate/severe pregnancy anemia. The reference category in column (3) and (4) is “no pregnancy anemia” Control variables include maternal literacy, ANC visit (dummy), first pregnancy (dummy), gestational trimester during Hb (preg.) measurement, caste category and block dummies. Hemoglobin is measured in g/dl. Conventional significance level: \* p<0.1, \*\* p<0.05, \*\*\* p<0.01.

STROBE Statement—Checklist of items that should be included in reports of *cohort studies*

|                              | Item No | Recommendation                                                                                                                                                                                                                                                                                                         | Page No                     |
|------------------------------|---------|------------------------------------------------------------------------------------------------------------------------------------------------------------------------------------------------------------------------------------------------------------------------------------------------------------------------|-----------------------------|
| <b>Title and abstract</b>    | 1       | (a) Indicate the study's design with a commonly used term in the title or the abstract                                                                                                                                                                                                                                 | 2                           |
|                              |         | (b) Provide in the abstract an informative and balanced summary of what was done and what was found                                                                                                                                                                                                                    | 2                           |
| <b>Introduction</b>          |         |                                                                                                                                                                                                                                                                                                                        |                             |
| Background/rationale         | 2       | Explain the scientific background and rationale for the investigation being reported                                                                                                                                                                                                                                   | 3                           |
| Objectives                   | 3       | State specific objectives, including any prespecified hypotheses                                                                                                                                                                                                                                                       | 3                           |
| <b>Methods</b>               |         |                                                                                                                                                                                                                                                                                                                        |                             |
| Study design                 | 4       | Present key elements of study design early in the paper                                                                                                                                                                                                                                                                | 3,4,5                       |
| Setting                      | 5       | Describe the setting, locations, and relevant dates, including periods of recruitment, exposure, follow-up, and data collection                                                                                                                                                                                        | 4                           |
| Participants                 | 6       | (a) Give the eligibility criteria, and the sources and methods of selection of participants. Describe methods of follow-up<br>(b) For matched studies, give matching criteria and number of exposed and unexposed                                                                                                      | 4                           |
| Variables                    | 7       | Clearly define all outcomes, exposures, predictors, potential confounders, and effect modifiers. Give diagnostic criteria, if applicable                                                                                                                                                                               | 5,6                         |
| Data sources/<br>measurement | 8*      | For each variable of interest, give sources of data and details of methods of assessment (measurement). Describe comparability of assessment methods if there is more than one group                                                                                                                                   | 5,6                         |
| Bias                         | 9       | Describe any efforts to address potential sources of bias                                                                                                                                                                                                                                                              | 7,8                         |
| Study size                   | 10      | Explain how the study size was arrived at                                                                                                                                                                                                                                                                              | 10                          |
| Quantitative variables       | 11      | Explain how quantitative variables were handled in the analyses. If applicable, describe which groupings were chosen and why                                                                                                                                                                                           | 7                           |
| Statistical methods          | 12      | (a) Describe all statistical methods, including those used to control for confounding<br>(b) Describe any methods used to examine subgroups and interactions<br>(c) Explain how missing data were addressed<br>(d) If applicable, explain how loss to follow-up was addressed<br>(e) Describe any sensitivity analyses | 6,7,8<br>7<br>7<br>8<br>7,8 |
| <b>Results</b>               |         |                                                                                                                                                                                                                                                                                                                        |                             |
| Participants                 | 13*     | (a) Report numbers of individuals at each stage of study—eg numbers potentially eligible, examined for eligibility, confirmed eligible, included in the study, completing follow-up, and analysed<br>(b) Give reasons for non-participation at each stage<br>(c) Consider use of a flow diagram                        | 10<br>10<br>10              |
| Descriptive data             | 14*     | (a) Give characteristics of study participants (eg demographic, clinical, social) and information on exposures and potential confounders<br>(b) Indicate number of participants with missing data for each variable of interest<br>(c) Summarise follow-up time (eg, average and total amount)                         | 9<br>9<br>4                 |
| Outcome data                 | 15*     | Report numbers of outcome events or summary measures over time                                                                                                                                                                                                                                                         | 9                           |

|    |                          |    |                                                                                                                                                                                                              |       |
|----|--------------------------|----|--------------------------------------------------------------------------------------------------------------------------------------------------------------------------------------------------------------|-------|
| 1  | Main results             | 16 | (a) Give unadjusted estimates and, if applicable, confounder-adjusted estimates and their precision (eg, 95% confidence interval). Make clear which confounders were adjusted for and why they were included | 11    |
| 2  |                          |    | (b) Report category boundaries when continuous variables were categorized                                                                                                                                    | 5     |
| 3  |                          |    | (c) If relevant, consider translating estimates of relative risk into absolute risk for a meaningful time period                                                                                             |       |
| 4  | Other analyses           | 17 | Report other analyses done—eg analyses of subgroups and interactions, and sensitivity analyses                                                                                                               | 11,12 |
| 5  | <b>Discussion</b>        |    |                                                                                                                                                                                                              |       |
| 6  | Key results              | 18 | Summarise key results with reference to study objectives                                                                                                                                                     | 13,14 |
| 7  | Limitations              | 19 | Discuss limitations of the study, taking into account sources of potential bias or imprecision. Discuss both direction and magnitude of any potential bias                                                   | 15,16 |
| 8  | Interpretation           | 20 | Give a cautious overall interpretation of results considering objectives, limitations, multiplicity of analyses, results from similar studies, and other relevant evidence                                   | 16    |
| 9  | Generalisability         | 21 | Discuss the generalisability (external validity) of the study results                                                                                                                                        | 5,16  |
| 10 | <b>Other information</b> |    |                                                                                                                                                                                                              |       |
| 11 | Funding                  | 22 | Give the source of funding and the role of the funders for the present study and, if applicable, for the original study on which the present article is based                                                | 16,17 |

\*Give information separately for exposed and unexposed groups.

**Note:** An Explanation and Elaboration article discusses each checklist item and gives methodological background and published examples of transparent reporting. The STROBE checklist is best used in conjunction with this article (freely available on the Web sites of PLoS Medicine at <http://www.plosmedicine.org/>, Annals of Internal Medicine at <http://www.annals.org/>, and Epidemiology at <http://www.epidem.com/>). Information on the STROBE Initiative is available at <http://www.strobe-statement.org>.
