# Supplementary material for: Pregnancy anaemia, child health and development: a cohort study in rural India
Source: PubMed Central journal article supplement — BMJ Open. 2021 Nov 12;11(11):e046802. doi: 10.1136/bmjopen-2020-046802 (PMC8593731; doi:10.1136/bmjopen-2020-046802), 2021-11-12
Supplement: bmjopen-2020-046802supp001.pdf [file bmjopen-2020-046802supp001.pdf]

## Online Supporting Material

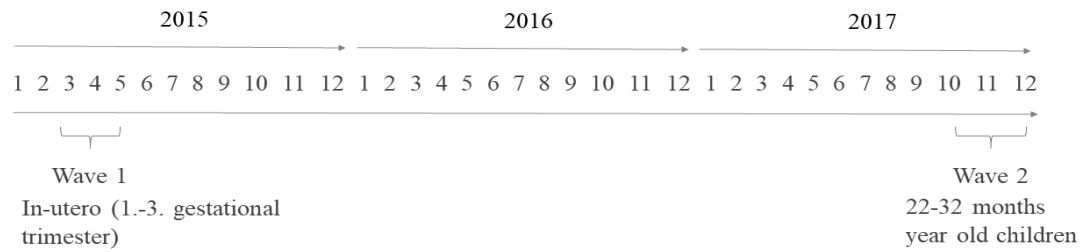

**Supplemental Figure S1 Timeline of data collections and the respective age of the children**

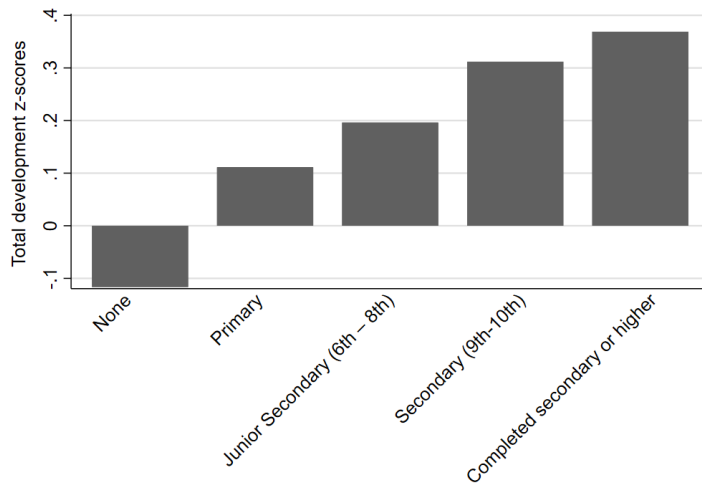

**Supplemental Figure S2 Average cumulative development test scores by maternal education category**

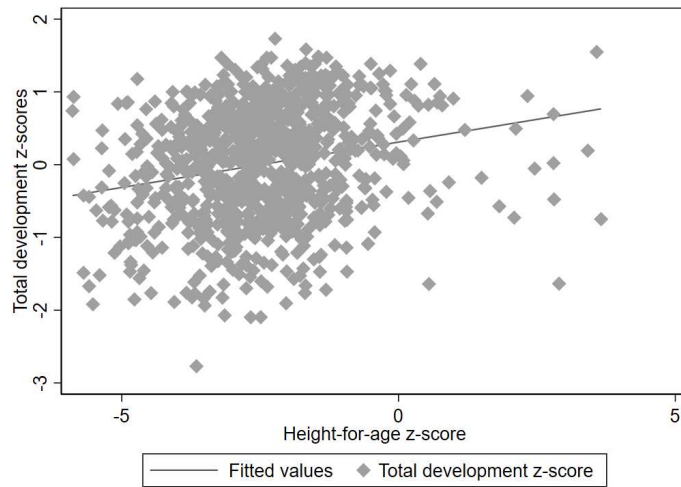

**Supplemental Figure S3 Average cumulative development test scores by of FREDI by child growth**

**Supplemental Table S1 Heterogeneous treatment effects using a linear regression model on child hemoglobin levels and skills dimensions**

|                                           | Hb (child)          | Motor skills      | Language skills    | Cognition skills   | Socio-emo. skill   |
|-------------------------------------------|---------------------|-------------------|--------------------|--------------------|--------------------|
| <b>Panel A: By antenatal care uptake</b>  |                     |                   |                    |                    |                    |
| Hb (preg.)                                | 0.162***<br>(0.042) | -0.006<br>(0.029) | 0.034<br>(0.030)   | -0.029<br>(0.025)  | 0.013<br>(0.025)   |
| Any ANC # Hb (preg.)                      | 0.014<br>(0.058)    | -0.006<br>(0.035) | -0.079*<br>(0.041) | -0.007<br>(0.034)  | -0.059*<br>(0.035) |
| R <sup>2</sup>                            | 0.174               | 0.248             | 0.221              | 0.304              | 0.332              |
| N                                         | 938                 | 972               | 996                | 990                | 994                |
| <b>Panel B: By child's sex</b>            |                     |                   |                    |                    |                    |
| Hb (preg.)                                | 0.208***<br>(0.041) | 0.009<br>(0.028)  | -0.018<br>(0.025)  | -0.027<br>(0.027)  | -0.025<br>(0.024)  |
| Male # Hb (preg.)                         | -0.077<br>(0.064)   | -0.037<br>(0.037) | 0.024<br>(0.038)   | -0.009<br>(0.034)  | 0.015<br>(0.036)   |
| R <sup>2</sup>                            | 0.176               | 0.247             | 0.218              | 0.303              | 0.321              |
| N                                         | 939                 | 972               | 996                | 990                | 994                |
| <b>Panel C: By caste category</b>         |                     |                   |                    |                    |                    |
| Hb (preg.)                                | 0.164***<br>(0.033) | -0.016<br>(0.023) | -0.030<br>(0.026)  | -0.035*<br>(0.019) | -0.019<br>(0.022)  |
| Scheduled caste or tribe # Hb (preg.)     | 0.033<br>(0.079)    | 0.032<br>(0.039)  | 0.088**<br>(0.044) | 0.005<br>(0.041)   | -0.008<br>(0.039)  |
| R <sup>2</sup>                            | 0.177               | 0.245             | 0.220              | 0.306              | 0.318              |
| N                                         | 908                 | 941               | 964                | 958                | 962                |
| <b>Panel D: By maternal literacy</b>      |                     |                   |                    |                    |                    |
| Hb (preg.)                                | 0.166***<br>(0.035) | -0.011<br>(0.022) | -0.007<br>(0.023)  | -0.021<br>(0.020)  | -0.015<br>(0.021)  |
| Maternal literacy # Hb (preg.)            | 0.014<br>(0.072)    | 0.010<br>(0.050)  | 0.003<br>(0.047)   | -0.047<br>(0.047)  | -0.013<br>(0.038)  |
| R <sup>2</sup>                            | 0.174               | 0.246             | 0.218              | 0.304              | 0.321              |
| N                                         | 939                 | 972               | 996                | 990                | 994                |
| <b>Panel E: By gestational trimester</b>  |                     |                   |                    |                    |                    |
| Hb (preg.)                                | 0.173***<br>(0.054) | -0.029<br>(0.038) | -0.029<br>(0.040)  | -0.051<br>(0.037)  | -0.026<br>(0.034)  |
| Second gestational trimester # Hb (preg.) | -0.031<br>(0.077)   | 0.039<br>(0.045)  | 0.061<br>(0.047)   | 0.029<br>(0.044)   | 0.041<br>(0.046)   |
| Third gestational trimester # Hb (preg.)  | 0.027<br>(0.073)    | 0.011<br>(0.052)  | -0.010<br>(0.053)  | 0.020<br>(0.050)   | -0.031<br>(0.040)  |
| R <sup>2</sup>                            | 0.175               | 0.246             | 0.220              | 0.303              | 0.323              |
| N                                         | 939                 | 972               | 996                | 990                | 994                |
| Controls                                  | Yes                 | Yes               | Yes                | Yes                | Yes                |
| Tester fixed effects                      | Yes                 | No                | No                 | No                 | No                 |
| FREDI fixed effects                       | No                  | Yes               | Yes                | Yes                | Yes                |

Notes: Outcome variables in column (2)-(5) are standardized test scores and the coefficients are shown in standard deviations. Standard errors clustered on village level are in parentheses. Included control variables: caste category, wealth quintile, food diversity in 2017, breast feeding, maternal age and literacy, first pregnancy (dummy), gestational trimester during Hb (preg.) measurement, ANC visit (dummy), child's sex and age, and block dummies. Additional control variable in column (2)-(5): test version. Tester fixed effects are anthropometric test conductor fixed effects. FREDI fixed effects are child development test conductor fixed effects. Hemoglobin is measured in g/dl. Inverse probability weight accounting for attrition applied. Conventional significance level: \* p<0.1, \*\* p<0.05, \*\*\* p<0.01.

**Supplemental Table S2 Linear regression model results of haemoglobin level of children on haemoglobin levels during pregnancy with additional covariates**

|                                   | Hb (child)          |
|-----------------------------------|---------------------|---------------------|---------------------|---------------------|---------------------|
| Hb (preg.)                        | 0.176***<br>(0.029) | 0.163***<br>(0.030) | 0.165***<br>(0.029) | 0.154***<br>(0.030) | 0.213***<br>(0.033) |
| Hb (mother)                       | 0.127***<br>(0.034) | 0.133***<br>(0.034) | 0.128***<br>(0.036) | 0.134***<br>(0.035) |                     |
| Mother gave birth in past 2 years | 0.013<br>(0.111)    |                     |                     |                     |                     |
| BMI (preg.)                       |                     | 0.009<br>(0.016)    |                     |                     |                     |
| Postnatal depression              |                     |                     | 0.087<br>(0.118)    |                     |                     |
| Controls                          | Yes                 | Yes                 | Yes                 | Yes                 | No                  |
| Tester fixed effects              | Yes                 | Yes                 | Yes                 | Yes                 | No                  |
| Panchayat dummies                 | No                  | No                  | No                  | Yes                 | No                  |
| Block dummies                     | Yes                 | Yes                 | Yes                 | No                  | No                  |
| N                                 | 896                 | 933                 | 807                 | 939                 | 939                 |
| R <sup>2</sup>                    | 0.173               | 0.174               | 0.161               | 0.236               | 0.054               |

Notes: Each column presents the estimation results of the main estimation with the displayed covariates or spatial fixed effects. Standard errors clustered on village level are in parentheses. Control variables: caste category, wealth quintile, food diversity in 2017, breast feeding, maternal age and literacy, first pregnancy (dummy), gestational trimester during Hb (preg.) measurement, ANC visit (dummy), child's sex and age.. Hemoglobin is measured in g/dl. Inverse probability weight accounting for attrition applied. Conventional significance level: \* p<0.1, \*\* p<0.05, \*\*\* p<0.01.

**Supplemental Table S3 Linear regression model results of cumulative test scores of children on haemoglobin levels during pregnancy with additional covariates**

|                                      | Cum.<br>development<br>score | Cum.<br>development<br>score | Cum.<br>development<br>score | Cum.<br>development<br>score | Cum.<br>development<br>score |
|--------------------------------------|------------------------------|------------------------------|------------------------------|------------------------------|------------------------------|
| Hb (preg.)                           | -0.023<br>(0.015)            | -0.015<br>(0.014)            | -0.009<br>(0.016)            | -0.015<br>(0.016)            | -0.008<br>(0.017)            |
| Hb (mother)                          | 0.042***<br>(0.016)          | 0.041**<br>(0.016)           | 0.036**<br>(0.017)           | 0.042**<br>(0.017)           |                              |
| Mother gave birth in past 2<br>years | -0.017<br>(0.050)            |                              |                              |                              |                              |
| BMI (preg.)                          |                              | 0.004<br>(0.008)             |                              |                              |                              |
| Postnatal depression                 |                              |                              | 0.045<br>(0.051)             |                              |                              |
| Controls                             | Yes                          | Yes                          | Yes                          | Yes                          | No                           |
| FREDI fixed effects                  | Yes                          | Yes                          | Yes                          | Yes                          | No                           |
| Panchayat dummies                    | No                           | No                           | No                           | Yes                          | No                           |
| Block dummies                        | Yes                          | Yes                          | Yes                          | No                           | No                           |
| N                                    | 926                          | 966                          | 836                          | 972                          | 972                          |
| R <sup>2</sup>                       | 0.335                        | 0.325                        | 0.325                        | 0.375                        | 0.000                        |

Notes: Each column presents the estimation results of the main estimation with the displayed covariates or spatial fixed effects. Standard errors clustered on village level are in parentheses. Control variables: caste category, wealth quintile, food diversity in 2017, breast feeding, maternal age and literacy, first pregnancy (dummy), gestational trimester during Hb (preg.) measurement, ANC visit (dummy), test version, child's sex and age. Hemoglobin is measured in g/dl. Inverse probability weight accounting for attrition applied. Conventional significance level: \* p<0.1, \*\* p<0.05, \*\*\* p<0.01.

**Supplemental Table S4 Linear regression model results of childhood Hb levels on Hb levels during pregnancy controlling for gestational month during Hb measurements and gestational trimester specific subgroup analyses**

|                                           | Hb (child)        | Hb (child)                | Hb (child)                 | Hb (child)                |
|-------------------------------------------|-------------------|---------------------------|----------------------------|---------------------------|
| Hb (preg.)                                | 0.17***<br>(0.03) | 0.13**<br>(0.06)          | 0.15***<br>(0.05)          | 0.20***<br>(0.05)         |
| Hb (mother)                               | 0.13***<br>(0.03) | 0.16**<br>(0.06)          | 0.13**<br>(0.06)           | 0.08<br>(0.06)            |
| Gestational month during preg. Hb measure | 0.01<br>(0.02)    |                           |                            |                           |
| Controls                                  | Yes               | Yes                       | Yes                        | Yes                       |
| Tester fixed effects                      | Yes               | Yes                       | Yes                        | Yes                       |
| Sample                                    | Full sample       | First trimester subsample | Second trimester subsample | Third trimester subsample |
| N                                         | 972               | 245                       | 467                        | 260                       |
| R <sup>2</sup>                            | 0.324             | 0.376                     | 0.416                      | 0.364                     |

Notes: In column (1) the dummies for the gestational trimester during pregnancy Hb measurement are replaced by the gestational month. Column (2)-(4) present the sub-group analyses for each gestational trimester. Standard errors clustered on village level are in parentheses. Control variables: caste category, wealth quintile, food diversity in 2017, breast feeding, maternal age and literacy, first pregnancy (dummy), ANC visit (dummy), child's sex and age and block dummies. Hemoglobin is measured in g/dl. Inverse probability weight accounting for attrition applied. Conventional significance level: \* p<0.1, \*\* p<0.05, \*\*\* p<0.01.

**Supplemental Table S5 Linear regression model results of cumulative test scores of children on Hb levels during pregnancy controlling for gestational month during Hb measurements and gestational trimester specific subgroup analyses**

|                                           | Cum. development score | Cum. development score    | Cum. development score     | Cum. development score    |
|-------------------------------------------|------------------------|---------------------------|----------------------------|---------------------------|
| Hb (preg.)                                | -0.01<br>(0.01)        | 0.00<br>(0.03)            | 0.01<br>(0.02)             | -0.06*<br>(0.03)          |
| Hb (mother)                               | 0.04**<br>(0.02)       | -0.04<br>(0.04)           | 0.04*<br>(0.02)            | 0.07**<br>(0.03)          |
| Gestational month during preg. Hb measure | 0.03**<br>(0.01)       |                           |                            |                           |
| Controls                                  | Yes                    | Yes                       | Yes                        | Yes                       |
| FREDI fixed effects                       | Yes                    | Yes                       | Yes                        | Yes                       |
| Sample                                    | Full sample            | First trimester subsample | Second trimester subsample | Third trimester subsample |
| N                                         | 972                    | 245                       | 467                        | 260                       |
| R <sup>2</sup>                            | 0.324                  | 0.376                     | 0.416                      | 0.364                     |

Notes: In column (1) the dummies for the gestational trimester during pregnancy Hb measurement are replaced by the gestational month. Column (2)-(4) present the sub-group analyses for each gestational trimester. Standard errors clustered on village level are in parentheses. Control variables: caste category, wealth quintile, food diversity in 2017, breast feeding, maternal age and literacy, first pregnancy (dummy), ANC visit (dummy), test version, child's sex and age. Hemoglobin is measured in g/dl. Inverse probability weight accounting for attrition applied. Conventional significance level: \* p<0.1, \*\* p<0.05, \*\*\* p<0.01.

### Supplemental Table S6 Logit estimation results of child survival until wave 2 on Hb levels and anemia status during pregnancy

|                                | Not alive        | Not alive        | Not alive        | Not alive        |
|--------------------------------|------------------|------------------|------------------|------------------|
| Hb (preg.)                     | 1.017<br>(0.047) | 0.991<br>(0.052) |                  |                  |
| Mild anemia (preg.)            |                  |                  | 0.995<br>(0.183) | 1.012<br>(0.205) |
| Moderate/severe anemia (preg.) |                  |                  | 1.080<br>(0.195) | 1.170<br>(0.230) |
| Controls                       | No               | Yes              | No               | Yes              |
| N                              | 1821             | 1622             | 1821             | 1622             |

*Notes:* Standard errors clustered in village level are in in parentheses. The binary outcome variable equals 1 if a child had not survived from pregnancy to wave 2. The coefficients are reported in odds ratios. Column (1) and (2) uses pregnancy Hb level of the mother as main explanatory variable. In Column (3) and (4), the two explanatory variables of interest are mild pregnancy anemia and moderate/severe pregnancy anemia. The reference category in column (3) and (4) is “no pregnancy anemia” Control variables include maternal literacy, ANC visit (dummy), first pregnancy (dummy), gestational trimester during Hb (preg.) measurement, caste category and block dummies. Hemoglobin is measured in g/dl. Conventional significance level: \* p<0.1, \*\* p<0.05, \*\*\* p<0.01.
